1 **Distinct Cdk9-phosphatase switches act at the beginning and end of elongation by**  
2 **RNA polymerase II**

3

4 **Pabitra K. Parua, Sampada Kalan, Bradley Benjamin, Miriam Sansó and Robert P.**

5 **Fisher\***

6

7 Department of Oncological Sciences, Icahn School of Medicine at Mount Sinai, New

8 York, NY, 10029-6574, USA

9 \*Corresponding author: [Robert.fisher@mssm.edu](mailto:Robert.fisher@mssm.edu)

10

11 **Running title: Cdk9-phosphatase circuits regulate transcription elongation**

12 **Reversible phosphorylation of Pol II and accessory factors helps order the**  
13 **transcription cycle. Here we define two kinase-phosphatase switches that operate**  
14 **at different points in human transcription. Cdk9/cyclin T1 (P-TEFb) catalyzes**  
15 **inhibitory phosphorylation of PP1 and PP4 complexes that localize to 3' and 5'**  
16 **ends of genes, respectively, and have overlapping but distinct specificities for**  
17 **Cdk9-dependent phosphorylations of Spt5, a factor instrumental in promoter-**  
18 **proximal pausing and elongation-rate control. PP1 dephosphorylates an Spt5**  
19 **carboxy-terminal repeat (CTR), but not Spt5-Ser666, a site between KOW motifs 4**  
20 **and 5, whereas PP4 can target both sites. In vivo, Spt5-CTR phosphorylation**  
21 **decreases as transcription complexes pass the cleavage and polyadenylation**  
22 **signal (CPS) and increases upon PP1 depletion, consistent with a PP1 function in**  
23 **termination first uncovered in yeast. Depletion of PP4-complex subunits increases**  
24 **phosphorylation of both Ser666 and the CTR, and promotes redistribution of**  
25 **promoter-proximally paused Pol II into gene bodies. These results suggest that**  
26 **switches comprising Cdk9 and either PP4 or PP1 govern pause release and the**  
27 **elongation-termination transition, respectively.**

28

29 The transcription cycle of RNA polymerase II (Pol II) is divided into discrete phases of  
30 initiation, elongation and termination. This process is regulated by cyclin-dependent  
31 kinases (CDKs) that generate stage-specific patterns of phosphorylation on the carboxy-  
32 terminal domain (CTD) of the Pol II large subunit Rpb1<sup>1,2</sup>. Differential phosphorylation of  
33 the CTD, which consists of heptad repeats of consensus sequence Y<sub>1</sub>S<sub>2</sub>P<sub>3</sub>T<sub>4</sub>S<sub>5</sub>P<sub>6</sub>S<sub>7</sub>,  
34 inscribes a “CTD code”<sup>3-5</sup> that is read by factors and enzymes that preferentially bind the  
35 modified CTD, in part to coordinate RNA-processing and chromatin modification with  
36 transcription<sup>6</sup>. Concurrently, CDKs phosphorylate many other targets to control  
37 progression through the transcription cycle<sup>7-9</sup>.

38

39 A promoter-proximal pause soon after the transition from initiation to elongation is a rate-  
40 limiting step in transcription of many Pol II-dependent genes in metazoans<sup>10,11</sup>. This  
41 pause is established within the first ~100 nucleotides (nt) downstream of the  
42 transcription start site (TSS) by recruitment of the DRB-sensitivity inducing factor  
43 (DSIF)—a heterodimer of Spt4 and Spt5 subunits conserved in all eukaryotes—and a  
44 metazoan-specific negative elongation factor (NELF)<sup>12</sup>. In human cells, DSIF and NELF  
45 recruitment (and thus, pause establishment) depends on activity of Cdk7, a component  
46 of transcription initiation factor TFIIF<sup>13-16</sup>, whereas pause release depends on the  
47 Cdk9/cyclin T1 complex, also known as positive transcription elongation factor b (P-  
48 TEFb)<sup>17</sup>, which phosphorylates residues in Pol II, Spt5, NELF and other components of  
49 the paused complex, to convert it into an active elongation complex from which NELF is  
50 displaced<sup>18,19</sup>. P-TEFb and its orthologs in yeast are the major CDKs active during the  
51 elongation phase of Pol II transcription, phosphorylating Spt5 to enable its function as a  
52 processivity factor<sup>20</sup>, and stimulating elongation rate by 3-4-fold<sup>21,22</sup>.

53

54 Pol II undergoes a second, 3' pause downstream of the cleavage and polyadenylation  
55 signal (CPS)<sup>23</sup>; this slowing manifests as a peak of Pol II occupancy in chromatin  
56 immunoprecipitation (ChIP) or run-on transcription profiles. Pol II paused downstream of  
57 the CPS becomes heavily phosphorylated on Ser2 of the CTD, which occurs as a  
58 consequence—rather than a cause—of its decreased elongation rate<sup>24,25</sup>. Pausing and  
59 Ser2 phosphorylation (pSer2) in turn promote recruitment of factors needed for mRNA  
60 3'-end maturation and termination<sup>26</sup>. We recently uncovered a regulatory circuit in  
61 fission yeast comprising Cdk9, the protein phosphatase 1 (PP1) isoform Dis2, and their  
62 common enzymatic target, Spt5, with the potential to switch Pol II from rapid elongation  
63 to a paused state permissive for termination<sup>27</sup>. During processive elongation, Cdk9

64 phosphorylates the Spt5 CTD and keeps Dis2 inactive by phosphorylating its carboxy-  
65 terminal region. As elongation complexes traverse the CPS, the Spt5 CTD is  
66 dephosphorylated dependent on activity of Dis2, which is a subunit of the cleavage and  
67 polyadenylation factor (CPF)<sup>28</sup>; the drop in phospho-Spt5 precedes an increase in  
68 pSer2 over the 3' pause site. Inactivation of Cdk9 or Dis2 leads to opposite effects  
69 downstream of the CPS—more rapid termination, or more extensive read-through  
70 transcription indicating a termination defect, respectively<sup>21,27</sup>. The effect of Cdk9  
71 inhibition was recapitulated by an *spt5* mutation that prevented Spt5-CTD  
72 phosphorylation<sup>29</sup>. Recently, human PP1 and its regulatory subunit PNUTS were  
73 implicated in Spt5-CTR dephosphorylation and Pol II deceleration downstream of the  
74 CPS<sup>30,31</sup>, suggesting conservation of this mechanism.

75

76 Here we show first that the entire Cdk9-PP1-Spt5 switch is conserved in human cells.  
77 Two PP1 catalytic-subunit isoforms and two residues of Spt5 were among targets of  
78 human P-TEFb we identified in a chemical-genetic screen<sup>9</sup>. Cdk9 inhibition diminishes  
79 phosphorylation of PP1 $\gamma$  on a known inhibitory site, and of Spt5 on carboxy-terminal  
80 repeat region 1 (CTR1), whereas depletion of PP1 increases steady-state levels of  
81 CTR1 phosphorylation (pCTR1). In unperturbed cells, pCTR1 drops, Pol II accumulates  
82 and pSer2 increases downstream of the CPS—the same relationships seen in fission  
83 yeast<sup>27</sup>. The Cdk9 substrate screen also identified Spt5-Ser666, a site outside the CTRs  
84 in a region linking Kyrpides-Ouzounis-Woese (KOW) motifs 4 and 5<sup>9</sup>. Although Ser666  
85 phosphorylation (pSer666) depends on Cdk9, it is resistant to dephosphorylation by  
86 PP1, and pSer666 and pCTR1 are distributed differently on chromatin: pSer666  
87 increases beyond the promoter-proximal pause and is retained downstream of the CPS.  
88 We identify a second site of Cdk9-mediated inhibitory phosphorylation in PP4R2, a  
89 regulatory subunit of the protein phosphatase 4 (PP4) complex. PP4 can

90 dephosphorylate pSer666 in vitro, in contrast to PP1, and is excluded from chromatin  
91 near the 3'-ends of genes where PP1 $\gamma$  occupancy is maximal, potentially explaining why  
92 pSer666 is not removed downstream of the CPS. PP4 depletion increases pSer666 and  
93 pCTR1 levels and attenuates promoter-proximal pausing in vivo. Therefore, Cdk9  
94 phosphorylates multiple sites on Spt5 while restraining activity of two phosphatases with  
95 different site-specificities and chromatin distributions, to generate diverse spatial  
96 patterns of Spt5 phosphorylation and possibly to support discrete functions at different  
97 steps of the transcription cycle.

98

## 99 **Results**

100 **A conserved kinase-phosphatase switch in transcription.** In fission yeast, Cdk9  
101 phosphorylates the Spt5 CTD<sup>32</sup> and the inhibitory Thr316 residue of PP1 isoform Dis2  
102<sup>27</sup>. As Pol II traverses the CPS, Spt5-CTD phosphorylation decreases dependent on  
103 Dis2 activity, and pSer2-containing Pol II accumulates with Spt5 in a 3'-paused complex  
104 poised for termination<sup>27,29</sup>. We asked if this switch is conserved in human cells, where  
105 two PP1 catalytic-subunit isoforms were identified in a chemical-genetic screen for direct  
106 Cdk9 substrates<sup>9</sup>. We validated PP1 $\gamma$ -Thr311 as a Cdk9-dependent phosphorylation  
107 site by two approaches. First, we treated green fluorescent protein (GFP)-tagged PP1 $\gamma$ ,  
108 expressed in HCT116 cells and immobilized with anti-GFP antibodies, with purified  
109 Cdk9/cyclin T1, followed by immunoblotting with an antibody specific for PP1 isoforms  
110 phosphorylated on their carboxy-terminal inhibitory sites. Increased signal after Cdk9  
111 treatment of wild-type PP1 $\gamma$  but not PP1 $\gamma$ <sup>T311A</sup> suggests that P-TEFb can indeed  
112 phosphorylate this residue in vitro (Fig. 1a).

113

114 Next we asked if phosphorylation of this site depends on Cdk9 in vivo. Treatment of  
115 HCT116 cells with the Cdk9-selective inhibitor NVP-2<sup>33</sup> diminished reactivity of  
116 immunoprecipitated PP1 $\gamma$  with the phospho-PP1 antibody to about the same extent as  
117 did a Cdk1-selective inhibitor (RO-3306), whereas combined treatment with NVP-2 and  
118 RO-3306 nearly abolished the signal (Fig. 1b), suggesting roughly equal contributions of  
119 the two CDKs to negative regulation of PP1 $\gamma$  in vivo. We surmise that PP1 $\gamma$ , like fission  
120 yeast Dis2<sup>27,34</sup>, is a regulatory component shared between the cell-division and  
121 transcription machineries.

122

123 CTR1 of human Spt5 contains multiple repeats of consensus sequence G-S-Q/R-T-P,  
124 including Thr806—a Cdk9 target site detected in our screen<sup>9</sup>—and is analogous to the  
125 CTD of the fission yeast protein (Supplementary Fig. 1a). After a 1-hr treatment with 10-  
126 50 nM NVP-2, pThr806 was diminished, whereas pSer2 was refractory to the Cdk9  
127 inhibitor at 20- to 100-fold higher doses (Fig. 1c). This is consistent with results in fission  
128 yeast, where Cdk9 is not a major contributor to pSer2 in vivo<sup>21,35</sup>. Pol II pSer2 was also  
129 relatively refractory to Cdk9 depletion by short hairpin RNA (shRNA) in HCT116 cells<sup>9</sup>.  
130 In fission yeast, chemical-genetic inhibition of Cdk9 led to rapid, nearly complete  
131 dephosphorylation of the Spt5 CTD ( $T_{1/2}$  ~20 sec); the rate of decay decreased ~4-fold in  
132 *dis2* mutant strains, suggesting that the fast kinetics in *dis2*<sup>+</sup> cells were partly due to the  
133 concomitant activation of Dis2 (PP1) when Cdk9 is inactivated<sup>27</sup>. In HCT116 cells, both  
134 pThr806 and a phosphorylation outside the CTRs, pSer666, were lost rapidly upon  
135 treatment with 250 nM NVP-2 ( $T_{1/2}$  ~10 min), consistent with a similar, reinforcing effect  
136 of kinase inhibition and phosphatase activation (Fig. 1d).

137

138 To complete the potential Cdk9-PP1-Spt5 circuit in human cells, we sought to validate  
139 Spt5 as a target of PP1. Purified, recombinant PP1 was able to dephosphorylate a  
140 CTR1-derived peptide phosphorylated on the position equivalent to Thr806 in the intact  
141 protein, but was inert towards a pSer666-containing peptide derived from the KOW4-  
142 KOW5 linker (Fig. 1e). The pSer666 substrate was efficiently dephosphorylated by  $\lambda$   
143 phosphatase, suggesting that this resistance was indeed due to restricted substrate  
144 specificity of PP1. We obtained similar results in assays of immunoprecipitated GFP-  
145 PP1 isoforms expressed in human cells (Supplementary Fig. 1b, c). Next we asked if  
146 Spt5 phosphorylation was sensitive to loss of PP1 function in vivo. Depletion of all three  
147 PP1 catalytic subunits with small interfering RNA (siRNA) increased steady-state levels  
148 of pThr806 in extracts (Fig. 1f), whereas knockdown of PP1 isoforms individually or in  
149 pairwise combinations had negligible effects on Spt5 phosphorylation (Supplementary  
150 Fig. 1d), suggesting redundancy or compensation. In contrast, even the triple  
151 knockdown had no effect on pSer666 (Fig. 1f, Supplementary Fig. 1e), consistent with  
152 the insensitivity of this modification to PP1 in vitro. Thus, 1) Cdk9 phosphorylates both  
153 Spt5 and PP1 $\gamma$  in vivo, 2) PP1 can dephosphorylate an Spt5 CTR1-derived peptide (but  
154 not a pSer666-containing peptide) in vitro, and 3) levels of pThr806 (but not pSer666)  
155 are limited by PP1 activity in vivo. Taken together, these results indicate that the  
156 enzymatic elements of an elongation-termination switch defined in fission yeast are  
157 conserved in human cells, but suggest that a different phosphatase might target  
158 pSer666 (and possibly other sites in the elongation complex), perhaps to support a  
159 different function.

160

161 **The Spt5 CTR is hypophosphorylated at the 3' pause.** We next asked if the *output* of  
162 Cdk9-PP1 signaling is similar in yeast and human cells. We first confirmed that  
163 antibodies against pThr806<sup>9</sup> recognized CTR1 phosphorylated by Cdk9 in vitro

164 (Supplementary Fig. 2a) but not unphosphorylated CTR1, or CTR2, another carboxy-  
165 terminal block of Thr-Pro-containing repeats in Spt5<sup>36,37</sup>. Reactivity with Spt5  
166 overexpressed in human cells was diminished but not abolished by mutation of Thr806  
167 to Ala (Supplementary Fig. 2b), suggesting that the antibody can recognize other  
168 repeats in CTR1. In ChIP-seq analysis in HCT116 cells (Supplementary Fig. 2c), the  
169 distribution of total Spt5 closely matched that of transcribing Pol II, with peaks near the  
170 TSS and downstream of the CPS, indicating promoter-proximal and 3' pausing,  
171 respectively (Fig. 2a, b). This is consistent with the tight association of DSIF with Pol II in  
172 elongation complexes<sup>38,39</sup>. In contrast, pThr806 (pCTR1) and pSer2—which have both  
173 been interpreted as markers of elongating Pol II—had different distributions. This was  
174 most evident downstream of the CPS, where total Spt5 accumulated together with Pol II;  
175 pSer2 peaked in this region, whereas pThr806 signals were diminished—a divergence  
176 evident both in metagene plots (Fig. 2a) and browser tracks from individual genes (Fig.  
177 2b). Comparison of metagene plots of pThr806:Spt5 and pSer2:Pol II ratios revealed an  
178 inverse relationship (Fig. 2c): pThr806:Spt5 began to drop just upstream of the CPS and  
179 reached a minimum at the 3' pause, whereas pSer2:Pol II increased at the CPS and  
180 peaked at the pause. The divergence between the two modifications at both the TSS  
181 and termination zone (TZ), despite the high correlation between total Pol II and Spt5,  
182 was confirmed by principal component analysis (Fig. 2d, Supplementary Fig. 2d, e).

183

184 A reduction in pCTR1 that precedes Pol II pausing and a pSer2 peak is consistent with a  
185 “sitting duck” model, whereby slowing of elongation triggers pSer2, recruitment of  
186 cleavage and polyadenylation factors and termination<sup>24,25</sup>. We detected a similar,  
187 reciprocal relationship between Spt5-CTD phosphorylation and pSer2 in fission yeast<sup>27</sup>,  
188 in which Pol II undergoes a metazoan-like pause downstream of the CPS<sup>40</sup>. In both  
189 human and fission yeast cells, Cdk9 inhibition slows elongation in gene bodies<sup>21,22</sup>; to



190 ask if this had the predicted, opposite effects on pThr806 and pSer2, we treated HCT116  
191 cells with NVP-2 and performed ChIP-qPCR analysis. A 1-hr treatment with 250 nM  
192 NVP-2 caused Pol II depletion from the gene body—as expected if promoter-proximal  
193 pause release was impeded—and near-complete loss of pThr806 on both *MYC* and  
194 *GAPDH* (Fig. 3a-c, Supplementary Fig. 3a-c). Absolute pSer2 levels were also  
195 diminished by NVP-2 treatment, but the pSer2:Pol II ratio was *increased* 2-3-fold in gene  
196 bodies, suggesting ectopically increased Ser2 phosphorylation due to slowed elongation.  
197

198 **Spt5 phosphorylations are differentially distributed on chromatin.** The metagene  
199 plots of pSer2:Pol II and pThr806:Spt5 ratios (Fig. 2c) also diverged at 5' ends of genes,  
200 where the former had a deep trough—presumably reflecting pausing of Pol II with high  
201 Ser5 phosphorylation (pSer5) but low pSer2<sup>2</sup>—whereas the latter peaked, suggesting  
202 that paused complexes can contain high levels of pCTR1. Both pThr806 and pSer666  
203 were among the many residues phosphorylated—in Spt5 and other components of the  
204 transcription machinery—when paused Pol II complexes were converted to elongating  
205 complexes by treatment with P-TEFb<sup>18</sup>. We therefore asked if pSer666 was enriched in  
206 complexes that had escaped the pause. In contrast to the anti-pThr806 antibody, anti-  
207 pSer666 was unable to recognize CTR1 or CTR2, but did react with full-length Spt5,  
208 dependent on pre-incubation with Cdk9 and ATP (Supplementary Fig. 4a). Moreover,  
209 immunoblot reactivity of Spt5 in cell extracts required an intact Ser666 residue  
210 (Supplementary Fig. 4b), suggesting that the antibody is specific for a single  
211 modification, and possibly explaining the lower signals it produced, relative to anti-  
212 pThr806, in ChIP-seq analysis (Fig. 2b). Despite lower signals, pSer666 had a  
213 distribution similar to that of total Spt5, including a peak downstream of the CPS, where  
214 pThr806 decreased (Fig. 2b, 4a and b). A metagene analysis comparing pSer666:Spt5  
215 and pThr806:Spt5 ratios revealed two differences: 1) a trough, rather than a peak, of

216 pSer666:Spt5 near the TSS, followed by an increase upon entering the gene body; and  
217 2) a shallower trough of pSer666:Spt5, relative to that of pThr806:Spt5, downstream of  
218 the CPS (Fig. 4c), suggesting that pSer666 was largely retained in the 3'-paused  
219 complex.

220

221 The relative increases in pSer666 downstream of the TSS were also detectable by ChIP-  
222 qPCR analysis on *MYC* and *GAPDH* genes, and sensitive to Cdk9 inhibition (Fig. 4d,  
223 Supplementary Fig. 4c). To ask if transcriptional induction triggers increased pSer666,  
224 we performed ChIP-qPCR at the p53-responsive, pause-regulated *CDKN1A* gene <sup>41</sup>.  
225 Upon p53 stabilization by nutlin-3 <sup>42</sup>, Pol II was redistributed from the promoter-proximal  
226 pause site into the body of the *CDKN1A* gene (Supplementary Fig. 4d). Both total Spt5  
227 and pThr806 signals increased roughly proportionally over the TSS and gene body,  
228 whereas pSer666 peaked ~0.5 kb downstream of the TSS (Fig. 4e). As was the case at  
229 constitutively expressed *MYC* and *GAPDH*, inhibiting Cdk9 diminished both pSer666  
230 and pThr806 on the induced *CDKN1A* gene, but increased the pSer2:Pol II ratio in the  
231 ~2-kb region downstream of the TSS (Fig. 4e and Supplementary Fig. 4d).

232

233 ChIP-seq analysis comparing nutlin-3- to mock-treated HCT116 cells revealed  
234 differential distributions of pSer666 and pThr806 on p53-responsive genes. Browser  
235 tracks of two representative p53 targets, *CDKN1A* and *GDF15* (Fig. 5a), as well as  
236 metagene plots of nutlin-3-induced genes (Fig. 5b, Supplementary Fig. 5a), showed 1)  
237 increased pSer666 but not pThr806, relative to total Spt5, in the region just downstream  
238 of the TSS; and 2) retention of pSer666 but diminution of pThr806 at the 3' pause  
239 downstream of the CPS, where pSer2 signals were maximal. Quantification of reads  
240 downstream of the TSS revealed more significant increases in pSer666 than in pThr806  
241 or pSer2, with the largest gains occurring on non-pause-regulated p53 target genes (Fig.

242 5c, Supplementary Fig. 5b-d). Downstream of the CPS there was a significant increase  
243 in pSer666 but not pThr806 in response to p53 induction (Supplementary Fig. 5e). Given  
244 the dependence of both pThr806 and pSer666 on Cdk9, their differential distributions  
245 might reflect removal by different phosphatases, a possibility we explore in the next  
246 section.

247

248 **PP4 is a Cdk9-regulated Spt5 phosphatase that supports promoter-proximal**  
249 **pausing.** We reasoned that a pSer666 phosphatase might also be a target of negative  
250 regulation by Cdk9, based on the similar kinetics of pThr806 and pSer666  
251 dephosphorylation after Cdk9 inhibition (Fig. 1d). Among the sites labeled by Cdk9 in  
252 HCT116 whole-cell extracts was Thr173 of the PP4 regulatory subunit PP4R2<sup>9</sup>. This  
253 residue and several others in the PP4 complex were previously shown to be  
254 phosphorylated, by a CDK, to inhibit PP4 activity in response to mitotic-spindle poisons  
255<sup>43</sup>. An anti-phospho-Thr173 antibody failed to detect this modification in cell extracts or in  
256 untreated anti-PP4R2 immunoprecipitates, but recognized immobilized PP4R2 after  
257 treatment with Cdk9 in vitro, validating PP4R2 as a potential P-TEFb substrate (Fig. 6a).  
258 A phosphatase precipitated with either anti-PP4R2 or anti-PP4C (catalytic subunit)  
259 antibodies was active towards both pSer666- and pThr806-containing phosphopeptides  
260 (Fig. 6b), in contrast to PP1, which only worked on the latter (Fig. 1e). Pre-treatment of  
261 HCT116 cells with either NVP-2 or RO-3306 increased the phosphatase activity of anti-  
262 PP4R2 or -PP4C immunoprecipitates (Fig. 6b) without affecting immunoprecipitation  
263 efficiency or complex integrity (Supplementary Fig. 6a), suggesting negative regulation  
264 of PP4 activity by Cdk9 or Cdk1—similar to the situation with PP1 $\gamma$  (Fig. 1b). Moreover,  
265 incubation of anti-PP4R2 immunoprecipitates with purified Cdk9 and ATP prior to a  
266 phosphatase assay reduced activity ~3-fold, indicating that PP4 complexes were  
267 sensitive to direct inhibition by P-TEFb (Fig. 6c).

268

269 To test whether PP4 regulated Spt5 phosphorylation in vivo, we depleted PP4 by  
270 infection with lentivirus vectors expressing shRNA targeting PP4C. Three different  
271 shRNAs each diminished PP4C levels by ~70-80%, and increased pSer666:Spt5 and  
272 pThr806:Spt5 signal ratios in immunoblots of chromatin extracts (Fig. 6d, Supplementary  
273 Fig. 6b). This was in contrast to effects of PP1 depletion, which preferentially affected  
274 pThr806 levels (Fig. 1f), but consistent with the substrate specificity of  
275 immunoprecipitated PP4 complexes in vitro (Fig. 6b).

276

277 To ask if differential localization of PP4 and PP1 might contribute to the different spatial  
278 distributions of Spt5 phospho-isoforms on chromatin, we performed CHIP-qPCR analysis  
279 of PP4C, PP4R2 and PP1 $\gamma$  on the *MYC*, *GAPDH* and *CDKN1A* genes (Fig. 7a, b and  
280 Supplementary Fig. 7a). Both PP4 subunits crosslinked predominantly between the TSS  
281 and ~2-3 kb downstream, and were present at low or undetectable levels near the 3'  
282 ends of genes. PP1 $\gamma$  had nearly the opposite distribution, crosslinking at near-  
283 background levels between the TSS and +2 kb before peaking close to the CPS,  
284 consistent with its residence in the CPF<sup>28,44,45</sup>. We also performed CHIP-qPCR analysis  
285 in cells exposed to NVP-2 (250 nM, 1 hr); this treatment had minimal effects on  
286 chromatin association of total PP4C (Supplementary Fig. 7b) or PP4R2 (Fig. 7c, left  
287 panel), but decreased the signals obtained with the anti-phospho-PP4R2-Thr173  
288 antibody to near-baseline levels (Fig. 7c, middle and right panels), consistent with  
289 negative regulation of PP4 by P-TEFb on chromatin.

290

291 Finally, we asked if we could mimic effects of P-TEFb activity on Pol II distribution by  
292 decreasing cellular levels of PP4R2. Depletion of PP4R2 with small interfering RNA

293 (siRNA) nearly abolished both total PP4R2 and PP4R2-pThr173 ChIP signals  
294 (Supplementary Fig. 7c), increased both pSer666 and pT806 in extracts (Fig. 7d) and  
295 shifted the distribution of Pol II into the bodies of the pause-regulated *MYC*, *GAPDH* and  
296 *CDKN1A* genes (Fig. 7e, Supplementary Fig. 7d-f). This suggests a role of PP4 in  
297 imposing a barrier to elongation at the promoter-proximal pause; this barrier can  
298 apparently be lowered artificially by depletion of PP4R2 or, we surmise, physiologically  
299 by PP4-inhibitory phosphorylation catalyzed by Cdk9. Taken together, our results  
300 suggest that two distinct Cdk9-phosphatase circuits operate at the beginning and end of  
301 the elongation phase in the Pol II transcription cycle (Fig. 7f).

302

### 303 **Discussion**

304 Spt5 is an ancient component of the transcription machinery, with functions in elongation  
305 and termination conserved in eukaryotes, archaea and prokaryotes<sup>46</sup>. Although studies  
306 of metazoan DSIF have emphasized its central roles in promoter-proximal pausing,  
307 recent work in yeast indicates functions for the Spt4/Spt5 heterodimer throughout the  
308 elongation phase and during termination<sup>47,48</sup>. Structural analyses reveal tight association  
309 between DSIF and the clamp region of Pol II in elongation complexes assembled from  
310 purified components<sup>38,39</sup>. Pol II and Spt5 can be cross-linked co-extensively along the  
311 entire lengths of genes<sup>27,47,48</sup>, also consistent with Spt5 acting throughout the  
312 transcription cycle.

313

314 A paused complex reconstituted in vitro with purified Pol II, DSIF and NELF was  
315 converted to an activated elongation complex by addition of elongation factors PAF and  
316 Spt6 and phosphorylation by P-TEFb<sup>18,19</sup>. The activated complex contained numerous  
317 sites phosphorylated by Cdk9 on Rpb1 (in both the CTD and the linker connecting the  
318 CTD to the rest of the protein), Spt5, Spt6 and multiple subunits of the PAF complex.

319 There were 14 phosphorylations on Spt5 alone, including 1) pThr806 and several other  
320 CDK-consensus (Thr-Pro) motifs in CTR1, and 2) pSer666 and two other Ser residues in  
321 the KOW4-KOW5 linker. These phosphorylations are likely to be reinforcing, such that  
322 modification of any individual site—or even whole domains—may not be necessary to  
323 promote release from the promoter-proximal pause. To circumvent potential redundancy  
324 of modifications within Spt5 and other components of the elongation complex, we  
325 focused on defining roles for the relevant modifying enzymes. Our results indicate that  
326 two classes of Spt5 mark placed by Cdk9 near the beginning of the transcription cycle  
327 are removed at different times, by different phosphatases. This raises the possibility that  
328 they perform different roles in regulating either intrinsic properties of the elongation  
329 complex (e.g. catalytic rate) or its interactions with other factors—evidence of an Spt5-  
330 phosphorylation “code.” Although both pSer666 and pThr806 are detectable over much  
331 of the gene body, pThr806 is enriched at the promoter-proximal pause whereas the  
332 pSer666:Spt5 ratio increases further downstream, suggesting that KOW4-KOW5 linker  
333 phosphorylation is more likely to occur at or after pause release. Downstream of the  
334 CPS, where elongation is slowed, pCTR1 drops—similar to the pattern observed in  
335 fission yeast<sup>27</sup>—whereas pSer666 is retained. This difference can be explained, without  
336 invoking additional kinases, by the inability of CPF-associated PP1 to dephosphorylate  
337 pSer666.

338

339 A decisive role in termination for PP1 and the Spt5 CTRs is supported by genetic  
340 interactions in fission yeast. Mutations of *spt5* that prevent CTD repeat phosphorylation  
341 at position Thr1 (*spt5-T1A*) suppressed a conditional *dis2-11* mutation, and mimicked  
342 termination-promoting effects of allele-specific Cdk9 inhibition<sup>21,27,29</sup>. The narrowing of  
343 the termination zone by genetic manipulations in yeast was similar to the effects of  
344 introducing an intrinsically slow Pol II mutant variant or a Cdk9 inhibitor in human cells

345 <sup>49,50</sup>. Conversely, *dis2* loss-of-function alleles broadened the termination zone <sup>27,29</sup>, as did  
346 a fast variant of human Pol II <sup>49</sup>. These results supported the idea that Spt5-CTR  
347 phosphorylation by Cdk9 is an accelerator of elongation <sup>21,22</sup>, whereas reversal of that  
348 phosphorylation by PP1 is a brake. Two recent reports extended this model to human  
349 cells, by showing that PP1 promotes Pol II slowing and termination through Spt5  
350 dephosphorylation <sup>30,31</sup>. Another implicated PP4 in regulation of Spt5 phosphorylation  
351 and function during early stages of transcription in *Caenorhabditis elegans* <sup>51</sup>. The  
352 results presented here establish Cdk9 as the linchpin of this network, able to  
353 phosphorylate multiple domains of Spt5 while restraining the activity of both PP4 and  
354 PP1 through inhibitory phosphorylation.

355

356 Based on our results we propose a phosphorylation-dephosphorylation cycle during  
357 transcription elongation, governed by Cdk9 and (at least) two opposing phosphatases,  
358 PP4 and PP1 (Fig. 7f). Localization of PP4 to 5' gene regions would help stabilize the  
359 promoter-proximal pause by keeping CTR1 and Ser666 (and possibly other sites in the  
360 paused complex) unphosphorylated until Cdk9 is recruited and activated. During pause  
361 release and subsequent elongation, Cdk9 reinforces its phosphorylation of Spt5 in both  
362 CTR1 and the KOW4-KOW5 loop by inhibiting both PP4 and PP1. As transcription  
363 complexes traverse the CPS there is a switch from a high-Cdk9/ low-PP1 state to its  
364 opposite—and thus from high to low CTR1 phosphorylation—by an undetermined  
365 mechanism. Exclusion of PP4 from downstream regions would ensure that PP1-resistant  
366 marks such as pSer666 persist in the 3'-paused complex, possibly to distinguish it from  
367 the complex paused in the promoter-proximal region.

368

369 The model accounts for differential distributions of pSer666, pThr806 and pSer2 on  
370 chromatin, and the biochemical relationships underpinning it have been validated by

371 results of kinase and phosphatase assays in vitro and of enzyme inhibition or depletion  
372 in vivo. Selective inhibition of Cdk9 in human cells stimulated the phosphatase activity of  
373 PP4 complexes and diminished PP4R2-pThr173 signals on chromatin. Cdk9 inhibition  
374 also diminished phosphorylation of a known inhibitory site on PP1 $\gamma$  in extracts, although  
375 we were unable to detect this modification on chromatin with available phosphospecific  
376 antibodies. Finally, our studies do not rule out contributions by other kinases and  
377 phosphatases, possibly arranged in similar switch-like circuits, to the regulation of Spt5  
378 phosphorylation or Pol II elongation.

379

380 We describe two regulatory circuits involving Cdk9 and distinct phosphatases subject to  
381 inhibitory phosphorylation by Cdk9. Both PP1 and PP4 are also inactivated by cell-cycle  
382 CDKs that phosphorylate either the PP1 catalytic subunit<sup>34,52,53</sup> or PP4R2<sup>43</sup>. Cdk1  
383 inhibits PP1 during mitosis; a drop in Cdk1 activity due to cyclin B degradation at  
384 metaphase leads to PP1 activation, dephosphorylation of mitotic phosphoproteins and  
385 mitotic exit<sup>34,54</sup>. We proposed that an analogous mechanism controls “transcription exit”  
386 through PP1-dependent Spt5 dephosphorylation in fission yeast<sup>27</sup>; here we provide  
387 evidence for conservation of this mechanism. A similar interaction between PP4 and a  
388 cell-cycle CDK may regulate the nucleation of microtubules at centrosomes<sup>43</sup>; we now  
389 implicate PP4 in a Cdk9-containing circuit regulating the transition to processive  
390 elongation.

391

392 Therefore, analogous modules, consisting of a CDK and an opposing phosphatase that  
393 is also a CDK substrate, govern transitions in both transcription and cell-division cycles.  
394 One property conferred by this arrangement is switch-like, all-or-none behavior: CDK  
395 inactivation causes rapid target dephosphorylation because it simultaneously activates  
396 the relevant phosphatase. We envision that transitions in the transcription cycle, such as



397 changes in elongation rate dictated by template sequence elements or chromatin  
398 features, are naturally switch-like. Moreover, linking activity of a single CDK to  
399 phosphatases with different specificities can generate spatially diverse patterns, even for  
400 modifications within a single effector protein. We note that the Cdk9-phosphatase  
401 circuits described here impart positional information, differentiating a promoter-  
402 proximally paused complex (pSer666 OFF/ pCTR1 OFF) from one paused at the 3' end  
403 (pSer666 ON/ pCTR1 OFF). This is a fundamental principle of cell-division control; one  
404 cyclin-CDK complex can drive the entire cell cycle, producing myriad different temporal  
405 patterns of target protein phosphorylation and function, in part through the action of  
406 multiple phosphatases<sup>55</sup>. We propose this as a strategy to order the Pol II cycle, in  
407 which relatively few CDKs (<10) are needed to phosphorylate hundreds of substrates  
408 that act at different steps of transcription<sup>7,9</sup>.

409

## 410 **Methods**

411 **Cell lines and drug treatments.** Colon carcinoma-derived HCT116 cells were cultured  
412 in McCoy's 5A medium with L-glutamine (Corning) supplemented with 10% Fetal Bovine  
413 Serum (FBS, Gibco) and 1x Penicillin-Streptomycin (Corning). Drug treatments were  
414 performed at 50-60% confluence by substituting the growth medium with fresh medium  
415 containing either DMSO, 250 nM (except where noted) NVP-2 (provided by N.S. Gray),  
416 10  $\mu$ M RO-3306 (Selleckchem) and 5  $\mu$ M nutlin-3 (Cayman Chemical Company).

417

418 **Antibodies.** The antibodies used were: rabbit anti- Rpb1 (sc-899; Santa Cruz  
419 Biotechnology), rabbit anti-Rpb1 (A304-405A & A304-405A, Bethyl Laboratories), rabbit  
420 anti-Rpb1 CTD pSer2 (ab5095, Abcam), rabbit anti-Spt5 (A300-868A, Bethyl  
421 Laboratories), mouse anti-Spt5 (sc-133217, Santa Cruz Biotechnology), rabbit anti-Spt5-  
422 pSer666 and -pThr806 (21<sup>st</sup> Century Biochemicals) previously described<sup>56</sup>, rabbit anti-

423 PP4R2 (A300-838A, Bethyl Laboratories), rabbit anti-PPP4C (A300-835A, Bethyl  
424 Laboratories), sheep anti-PP4R2-pThr173 (Division of Signal Transduction Therapy,  
425 University of Dundee Scotland)<sup>43</sup>, rabbit phospho-PP1 $\alpha$  (Thr320) antibody (2581S, Cell  
426 Signaling Technology), mouse anti-GFP (sc-9996, Santa Cruz Biotechnology), mouse  
427 anti-pan PP1 (sc-7482, Santa Cruz Biotechnology), goat anti-PP1 $\alpha$  (sc-6104, Santa  
428 Cruz Biotechnology), mouse anti-PP1 $\beta$  (sc-373782, Santa Cruz Biotechnology), rabbit  
429 anti-PP1 $\gamma$  (A300-906A, Bethyl Laboratories), goat anti-PP1 $\gamma$  (sc-6108, Santa Cruz  
430 Biotechnology), mouse anti-tubulin (T5168, Sigma-Aldrich), rabbit anti-GST (sc-459,  
431 Santa Cruz Biotechnology), mouse anti-FLAG<sup>®</sup> M2 (F3165, Sigma-Aldrich) and rabbit  
432 anti-FLAG (2368, Cell Signaling).

433

434 **Protein Extraction.** Whole-cell extracts were prepared as follows: Cells were washed  
435 twice with cold phosphate-buffered saline (PBS) and collected in RIPA buffer (50 mM  
436 Tris-HCl at pH 8.0, 150 mM NaCl, 1% nonidet-P-40, 0.5% sodium deoxycholate, 0.1%  
437 sodium dodecyl sulfate) supplemented with protease inhibitors (10  $\mu$ M Pepstatin A, 1  $\mu$ M  
438 Leupeptin, 2 mM 4-(2-aminoethyl)benzenesulfonyl fluoride hydrochloride [AEBSF], 1  $\mu$ M  
439 Aprotinin, 1mM phenylmethylsulfonyl fluoride [PMSF]), phosphatase inhibitors (40 mM  
440 sodium  $\beta$ -glycerophosphate, 4 mM Na<sub>3</sub>VO<sub>4</sub>, 50 mM NaF) and 1 mM DTT. Cells were  
441 lysed in a Bioruptor (Diagenode) for 10 min with cycles of 30 sec ON and 30 sec OFF.  
442 The lysate was clarified by centrifugation at 4°C at 20,000 x g<sub>av</sub> for 10 min. The  
443 chromatin fraction was prepared as described previously<sup>57</sup>.

444

445 **RNAi.** PP1 isoform-specific siRNAs targeting PP1 $\alpha$  (sc-36299), PP1 $\beta$  (sc-36295) and  
446 PP1 $\gamma$  (sc-36297) were from Santa Cruz Biotechnology. For pan-PP1 depletion equimolar  
447 concentrations of each siRNA were used. HCT116 cells were transfected using  
448 Lipofectamine RNAiMAX (Invitrogen) according to manufacturer's instructions. Cells

449 were collected 24 hr post-transfection for lysate preparation and immunoblotting. Human  
450 embryonic kidney (HEK293) cells cultured in Dulbecco's Modified Eagle's Medium  
451 (DMEM), supplemented with 10% FBS and 1x Penicillin-Streptomycin, were used to  
452 generate lentivirus particles expressing PP4C-targeting shRNA obtained from Sigma:  
453 shRNA-1 (TRCN0000010737), shRNA-2 (TRCN0000272746), and shRNA-3  
454 (TRCN0000272747). HCT116 cells were infected with pLKO.1-puro shRNA lentivirus  
455 and selected for 96 hr with 2 µg/ml puromycin and protein depletion verified by  
456 immunoblot. For PP4R2 depletion, siRNA targeting PP4R2 (sc-78526, Santa Cruz  
457 Biotechnology) was used. HCT116 cells were transfected using Lipofectamine  
458 RNAiMAX according to the manufacturer's instructions. After 48 hr of transfection, cells  
459 were crosslinked with 1% formaldehyde for ChIP.

460

461 **Mutagenesis and ectopic protein expression.** Phosphorylated residues of Spt5 were  
462 substituted with Ala or Asp using site-directed mutagenesis kits (Agilent Technologies),  
463 the oligonucleotides listed in Supplementary Table 1, and pCDNA-N-FLAG-SUPT5H  
464 (Sino Biological) as a template, according to manufacturer's protocols. HCT116 cells  
465 were transfected with pCDNA-N-FLAG-SUPT5H-variants using Lipofectamine 3000  
466 (Invitrogen) according to manufacturer's instructions. Whole-cell lysates were  
467 immunoprecipitated with mouse anti-FLAG antibody, and immunoblotted with anti-  
468 pSer666, anti-pThr806, anti-Spt5 or rabbit anti-FLAG.

469

470 **Immunoprecipitation and immunoblotting.** To immunoprecipitate proteins, 2 mg of  
471 whole-cell protein extract was incubated with antibodies for 4 hr at 4°C in RIPA buffer.  
472 Protein G Sepharose™ 4 Fast Flow (GE Healthcare), pre-blocked with 1 mg/ml bovine  
473 serum albumin (BSA, Gemini Bio-products) and 0.25 mg/ml salmon sperm DNA  
474 (Trevigen) was added, and the resulting suspension was incubated for 2 hr at 25°C.

475 Beads were washed three times with ice-cold RIPA buffer. For immunoblot analysis,  
476 proteins were separated by SDS-PAGE and transferred to Amersham™ Protran™ 0.45  
477 μm nitrocellulose membranes (GE Healthcare Life Sciences). The membranes were  
478 probed with primary antibodies at dilutions recommended by the suppliers. PP4R2  
479 phospho-specific antibody (anti-PP4R2-pThr173) was used in the presence of a 10-fold  
480 molar excess of the appropriate non-phosphorylated peptide. Immunoblots were  
481 developed with either Horseradish Peroxidase (HRP) conjugated donkey anti-rabbit  
482 (NA934V, GE Healthcare Life Sciences), sheep anti-mouse (NA9310V, GE Healthcare  
483 Life Sciences), donkey anti-sheep (713-035-147, Jackson ImmunoResearch), donkey  
484 anti-goat (sc-2020, Santa Cruz Biotechnology), or Alexa Fluor-coupled goat anti-rabbit  
485 (A21076, Life Technologies), goat anti-mouse (A11375, Life Technologies), or donkey  
486 anti-goat (705-625-147, Jackson ImmunoResearch). Proteins were detected either by  
487 enhanced chemiluminescence (ECL, HyGLO HRP detection kit, Denville Scientific) or  
488 with Odyssey Imaging System (LI-COR Biosciences).

489

490 **Kinase and phosphatase assays.** To detect Cdk9-dependent phosphorylations, GFP-  
491 PP1γ or PP4R2 were immunoprecipitated from whole-cell extracts. The bead-bound  
492 proteins were subjected to Cdk9 treatment as described <sup>15</sup>. Briefly, immunoprecipitated  
493 proteins were either mock-treated or treated with purified Cdk9/cyclin T1 (5-10 ng) and  
494 ATP (1 mM) in kinase assay buffer (25 mM HEPES, pH 7.4, 10 mM NaCl, 10 mM MgCl<sub>2</sub>,  
495 1 mM DTT) for 30 min at 25°C. The beads were washed three times with RIPA buffer  
496 and analyzed by SDS-PAGE and immunoblotting. The PP4R2 samples (mock- and  
497 Cdk9-treated) were divided into two equal parts for immunoblot analysis and  
498 phosphatase assays. To measure protein phosphatase activity, GFP-tagged PP1  
499 isoforms (PP1α, PP1β and PP1γ), PP4C and PP4R2 immunoprecipitated from whole-  
500 cell extracts were incubated with 50 μM phosphopeptide (Spt5-pThr806, Spt5-pSer666,

501 H3pSer10) at 37°C for 1 hr. Colorimetric assays were performed in triplicate using  
502 BioMOL Green (Enzo Life Sciences) in 25 mM HEPES (pH 7.5), 100 mM NaCl, 1 mM  
503 MnCl<sub>2</sub>, 1 mM DTT, in 96-well plates as described in manufacturer's protocol. To test  
504 specificity of anti-pSer666 and anti-pThr806 antibodies, purified Cdk9/cyclin T1 was  
505 used to phosphorylate substrates purified from *E. coli* expressing DSIF (Spt4/Spt5  
506 heterodimer), GST-CTR1 (amino acids 720-830 of Spt5 fused to glutathione-S-  
507 transferase) and GST-CTR2 (amino acids 844-1087 of Spt5) at a kinase:substrate ratio  
508 of 1:2000 for 15 min at 25°C in kinase assay buffer. The reactions were analyzed by  
509 SDS-PAGE and immunoblotting with anti-pSer666, anti-pThr806, anti-GST or anti-Spt5.  
510

511 **ChIP-qPCR.** ChIP-qPCR experiments were done as described previously<sup>15</sup>. In brief,  
512 HCT116 cells grown to 50-60% confluence were crosslinked with 1% formaldehyde  
513 (Fisher Scientific) for 10 min at 25°C. Crosslinking was quenched with 125 mM glycine  
514 for 5 min at 25°C. Cells were washed twice with ice-cold PBS and collected into 1 ml of  
515 RIPA buffer supplemented with protease and phosphatase inhibitors for each 150-mm  
516 dish. Cells were lysed and chromatin sheared by sonication in a Bioruptor at high power,  
517 for 5 x 10 min with cycles of 30 sec ON and 30 sec OFF. Lysates were clarified by  
518 centrifugation at 20,000 x g<sub>av</sub> for 20 min at 4°C. Before immunoprecipitation, lysates (~5  
519 x 10<sup>6</sup> cells per experiment) were pre-cleared with Pierce™ Protein A Agarose (Thermo  
520 Scientific) for 2 hr at 4°C. Beads were separated by centrifugation at 4000 x g<sub>av</sub> for 1 min  
521 at 4°C. The resulting supernatant was incubated with antibodies for 4 hr at 4°C with  
522 constant nutation. The suspension was incubated at 25°C for an additional 2 hr with  
523 Protein G Sepharose™ 4 Fast Flow or Dynabeads™ Protein G (Invitrogen), pre-blocked  
524 with 1 mg/ml BSA and 0.25 mg/ml Salmon Sperm DNA. The beads were washed with 2  
525 x RIPA buffer, 4 x Szak IP wash buffer (100 mM Tris-HCl, pH 8.5, 500 mM lithium  
526 chloride, 1% (v/v) nonidet-P-40, 1% (w/v) sodium deoxycholate), 2 x RIPA buffer and 2 x

527 TE buffer. After all wash steps, centrifugation was performed at 1700 x g for 1 min at  
528 4°C. Protein-nucleic acid complexes were eluted from beads with elution buffer (46 mM  
529 TrisHCl, pH 8.0, 0.65 mM EDTA, 1% SDS) by incubating at 65°C for 15 min with  
530 occasional vortexing. Reversal of crosslinking was done by incubating at 65°C for 16 hr.  
531 The un-crosslinked suspension was treated with 1 µg of RNase A at 37°C for 30 min and  
532 with 0.8 units of Proteinase K (NEB) at 45°C for 45 min. DNA was purified using  
533 QIAquick® PCR Purification Kit (Qiagen) according to the manufacturer's protocol. The  
534 purified DNA was subjected to either qPCR with Radiant™ Green qPCR Master Mix (2x)  
535 (Radiant Molecular Tools) in 386-well plates, or library preparation for sequencing.

536

537 **ChIP-seq.** Preparation of multiplexed ChIP-seq libraries from purified  
538 immunoprecipitated chromatin and sequencing were performed as described<sup>27</sup>. In brief,  
539 the NEBNext Ultra II DNA Library Preparation kit was used to generate libraries using 5-  
540 10 ng of input or immunoprecipitated DNA and barcode adaptors (NEBNext Multiplex  
541 Oligos for Illumina (Set 1, E7335 and Set 2, E7500)). Single-end (75-nt reads) or paired-  
542 end (40-nt reads) sequencing was performed on an Illumina NextSeq 500.

543

544 **Bioinformatic and statistical analysis.** We used 'FastQC Read Quality Reports'  
545 (Galaxy Version 0.72) and 'Trimmomatic Flexible Read Trimming Tool' (Galaxy Version  
546 0.36.6) to check quality of the sequencing reads and for barcode trimming, respectively.  
547 Trimmed sequencing reads were aligned to the human genome (version b37, hg19)  
548 using Bowtie2<sup>58</sup> in Galaxy (Galaxy Version 2.3.4.2). Normalization of the aligned reads  
549 was done using 'bamCoverage' (Galaxy Version 3.1.2.0.0) by 1) computing and applying  
550 scaling factor obtained using aligned sequencing reads of the spike-in reference genome  
551 (for spike-in samples) and 2) by computing RPKM (reads per kilobase per million) (for  
552 the samples without spike-in control). Aligned sequences of each biological replicate

553 were processed separately to identify enriched binding sites using MACS2 callpeak  
554 program<sup>59</sup> (Galaxy Version 2.1.1.20160309.6). The resulting bedgraph files were  
555 converted to bigwig using 'Wig/BedGraph-to-bigWig converter' (Galaxy Version 1.1.1),  
556 replicates were combined using 'Concatenate datasets' (Galaxy Version 1.0.0). Matrix  
557 was computed using 'computeMatrix' (Galaxy v.2.3.6.0) in DeepTools<sup>60</sup> to prepare data  
558 for plotting heat maps and/or profiles of given regions. The genome-wide distributions,  
559 heat maps and metagene plots were created using 'plotHeatmap' (Galaxy Version  
560 3.1.2.0.1) and 'plotProfile' (Galaxy Version 3.1.2.0.0) tools, respectively. The phospho-  
561 over-total signal ratios ( $\log_2$ -ratio) were calculated using 'bigwigCompare' (Galaxy  
562 Version 3.1.2.0.0). To generate principal component analysis (PCA) plots 'plotPCA'  
563 (Galaxy Version 3.1.2.0.0) was used.

564

565 *P* values were calculated using Student's t-test. The "n" values represent number of  
566 biological replicates, and the error bars correspond to  $\pm$  standard deviation (s.d) among  
567 biological and technical replicates.

568

#### 569 **Data availability**

570 All the raw datasets from sequencing experiments are deposited in NCBI, accession  
571 number GSE138548.

572

#### 573 **Acknowledgments**

574 We thank N.S. Gray (Dana Farber Cancer Institute) for providing NVP-2, C.J. Hastie  
575 (University of Dundee) for anti-phospho-PP4R2-Thr173 antibody, D. Hasson (Mount  
576 Sinai) for advice and assistance in analyzing ChIP-seq data, J. Michalak for early efforts  
577 to deplete PP1 and N. Jain for technical assistance. This work was supported by



578 National Institutes of Health grant R35 GM127289 to R.P.F. Next-generation sequencing  
579 was supported in part by grant P30 CA196521 to the Tisch Cancer Institute.

580

### 581 **Author Contributions**

582 P.K.P designed, performed and analyzed most of the experiments. S.K. performed  
583 shRNA and siRNA depletions of PP1 and PP4 subunits and subsequent biochemical  
584 analysis. B.B. performed NVP-2 treatment and analysis of Cdk9 target phosphorylation,  
585 ChIP-qPCR and initial ChIP-seq analysis of phosphorylated and total Spt5 and Pol II.  
586 M.S. generated mammalian PP1 expression constructs and validated PP1 as a Cdk9  
587 substrate. R.P.F. designed and supervised experiments and interpreted data. P.K.P and  
588 R.P.F wrote the paper.

589

### 590 **References**

- 591 1 Buratowski, S. Progression through the RNA polymerase II CTD cycle. *Mol Cell*  
592 **36**, 541-546 (2009).
- 593 2 Zaborowska, J., Egloff, S. & Murphy, S. The pol II CTD: new twists in the tail. *Nat*  
594 *Struct Mol Biol* **23**, 771-777, doi:10.1038/nsmb.3285 (2016).
- 595 3 Buratowski, S. The CTD code. *Nat Struct Biol* **10**, 679-680, doi:10.1038/nsb0903-  
596 679 (2003).
- 597 4 Egloff, S. & Murphy, S. Cracking the RNA polymerase II CTD code. *Trends*  
598 *Genet* **24**, 280-288, doi:10.1016/j.tig.2008.03.008 (2008).
- 599 5 Schwer, B. & Shuman, S. Deciphering the RNA polymerase II CTD code in  
600 fission yeast. *Mol Cell* **43**, 311-318 (2011).
- 601 6 Hsin, J. P. & Manley, J. L. The RNA polymerase II CTD coordinates transcription  
602 and RNA processing. *Genes Dev* **26**, 2119-2137, doi:10.1101/gad.200303.112  
603 (2012).
- 604 7 Poss, Z. C. *et al.* Identification of Mediator Kinase Substrates in Human Cells  
605 using Cortistatin A and Quantitative Phosphoproteomics. *Cell Rep* **15**, 436-450,  
606 doi:10.1016/j.celrep.2016.03.030 (2016).
- 607 8 Sansó, M. & Fisher, R. P. Pause, Play, Repeat: CDKs Push RNAP II's Buttons.  
608 *Transcription* **4** (2013).
- 609 9 Sansó, M. *et al.* P-TEFb regulation of transcription termination factor Xrn2  
610 revealed by a chemical genetic screen for Cdk9 substrates. *Genes Dev* **30**, 117-  
611 131, doi:10.1101/gad.269589.115 (2016).
- 612 10 Adelman, K. & Lis, J. T. Promoter-proximal pausing of RNA polymerase II:  
613 emerging roles in metazoans. *Nat Rev Genet* **13**, 720-731 (2012).



- 614 11 Core, L. & Adelman, K. Promoter-proximal pausing of RNA polymerase II: a  
615 nexus of gene regulation. *Genes Dev* **33**, 960-982, doi:10.1101/gad.325142.119  
616 (2019).
- 617 12 Yamaguchi, Y. *et al.* NELF, a multisubunit complex containing RD, cooperates  
618 with DSIF to repress RNA polymerase II elongation. *Cell* **97**, 41-51 (1999).
- 619 13 Baluapuri, A. *et al.* MYC Recruits SPT5 to RNA Polymerase II to Promote  
620 Processive Transcription Elongation. *Mol Cell*, doi:10.1016/j.molcel.2019.02.031  
621 (2019).
- 622 14 Glover-Cutter, K. *et al.* TFIIH-associated Cdk7 kinase functions in  
623 phosphorylation of C-terminal domain Ser7 residues, promoter-proximal pausing,  
624 and termination by RNA polymerase II. *Mol Cell Biol* **29**, 5455-5464 (2009).
- 625 15 Larochele, S. *et al.* Cyclin-dependent kinase control of the initiation-to-elongation  
626 switch of RNA polymerase II. *Nat Struct Mol Biol* **19**, 1108-1115 (2012).
- 627 16 Nilson, K. A. *et al.* THZ1 Reveals Roles for Cdk7 in Co-transcriptional Capping  
628 and Pausing. *Mol Cell* **59**, 576-587, doi:10.1016/j.molcel.2015.06.032 (2015).
- 629 17 Peterlin, B. M. & Price, D. H. Controlling the elongation phase of transcription  
630 with P-TEFb. *Mol Cell* **23**, 297-305 (2006).
- 631 18 Vos, S. M. *et al.* Structure of activated transcription complex Pol II-DSIF-PAF-  
632 SPT6. *Nature* **560**, 607-612, doi:10.1038/s41586-018-0440-4 (2018).
- 633 19 Vos, S. M., Farnung, L., Urlaub, H. & Cramer, P. Structure of paused  
634 transcription complex Pol II-DSIF-NELF. *Nature* **560**, 601-606,  
635 doi:10.1038/s41586-018-0442-2 (2018).
- 636 20 Yamada, T. *et al.* P-TEFb-mediated phosphorylation of hSpt5 C-terminal repeats  
637 is critical for processive transcription elongation. *Mol Cell* **21**, 227-237 (2006).
- 638 21 Booth, G. T., Parua, P. K., Sanso, M., Fisher, R. P. & Lis, J. T. Cdk9 regulates a  
639 promoter-proximal checkpoint to modulate RNA polymerase II elongation rate in  
640 fission yeast. *Nat Commun* **9**, 543, doi:10.1038/s41467-018-03006-4 (2018).
- 641 22 Jonkers, I., Kwak, H. & Lis, J. T. Genome-wide dynamics of Pol II elongation and  
642 its interplay with promoter proximal pausing, chromatin, and exons. *Elife* **3**,  
643 e02407, doi:10.7554/eLife.02407 (2014).
- 644 23 Glover-Cutter, K., Kim, S., Espinosa, J. & Bentley, D. L. RNA polymerase II  
645 pauses and associates with pre-mRNA processing factors at both ends of genes.  
646 *Nat Struct Mol Biol* **15**, 71-78 (2008).
- 647 24 Davidson, L., Muniz, L. & West, S. 3' end formation of pre-mRNA and  
648 phosphorylation of Ser2 on the RNA polymerase II CTD are reciprocally coupled  
649 in human cells. *Genes Dev* **28**, 342-356, doi:10.1101/gad.231274.113 (2014).
- 650 25 Fong, N., Saldi, T., Sheridan, R. M., Cortazar, M. A. & Bentley, D. L. RNA Pol II  
651 Dynamics Modulate Co-transcriptional Chromatin Modification, CTD  
652 Phosphorylation, and Transcriptional Direction. *Mol Cell*,  
653 doi:10.1016/j.molcel.2017.04.016 (2017).
- 654 26 Proudfoot, N. J. Transcriptional termination in mammals: Stopping the RNA  
655 polymerase II juggernaut. *Science* **352**, aad9926, doi:10.1126/science.aad9926  
656 (2016).
- 657 27 Parua, P. K. *et al.* A Cdk9-PP1 switch regulates the elongation-termination  
658 transition of RNA polymerase II. *Nature* **558**, 460-464, doi:10.1038/s41586-018-  
659 0214-z (2018).
- 660 28 Vanoosthuysse, V. *et al.* CPF-associated phosphatase activity opposes  
661 condensin-mediated chromosome condensation. *PLoS Genet* **10**, e1004415,  
662 doi:10.1371/journal.pgen.1004415 (2014).

- 663 29 Kecman, T. *et al.* Elongation/Termination Factor Exchange Mediated by PP1  
664 Phosphatase Orchestrates Transcription Termination. *Cell Rep* **25**, 259-269  
665 e255, doi:10.1016/j.celrep.2018.09.007 (2018).
- 666 30 Cortazar, M. A. *et al.* Control of RNA Pol II Speed by PNUTS-PP1 and Spt5  
667 Dephosphorylation Facilitates Termination by a "Sitting Duck Torpedo"  
668 Mechanism. *Mol Cell* **76**, 896-908 e894, doi:10.1016/j.molcel.2019.09.031  
669 (2019).
- 670 31 Eaton, J. D., Francis, L., Davidson, L. & West, S. A unified allosteric/torpedo  
671 mechanism for transcriptional termination on human protein-coding genes.  
672 *Genes Dev* **34**, 132-145, doi:10.1101/gad.332833.119 (2020).
- 673 32 Pei, Y. & Shuman, S. Characterization of the *Schizosaccharomyces pombe*  
674 Cdk9/Pch1 protein kinase: Spt5 phosphorylation, autophosphorylation, and  
675 mutational analysis. *J Biol Chem* **278**, 43346-43356 (2003).
- 676 33 Olson, C. M. *et al.* Pharmacological perturbation of CDK9 using selective CDK9  
677 inhibition or degradation. *Nat Chem Biol* **14**, 163-170,  
678 doi:10.1038/nchembio.2538 (2018).
- 679 34 Grallert, A. *et al.* A PP1-PP2A phosphatase relay controls mitotic progression.  
680 *Nature* **517**, 94-98, doi:10.1038/nature14019 (2015).
- 681 35 Viladevall, L. *et al.* TFIIF and P-TEFb coordinate transcription with capping  
682 enzyme recruitment at specific genes in fission yeast. *Mol Cell* **33**, 738-751  
683 (2009).
- 684 36 Ivanov, D., Kwak, Y. T., Guo, J. & Gaynor, R. B. Domains in the SPT5 protein  
685 that modulate its transcriptional regulatory properties. *Mol Cell Biol* **20**, 2970-  
686 2983 (2000).
- 687 37 Larochelle, S. *et al.* Dichotomous but stringent substrate selection by the dual-  
688 function Cdk7 complex revealed by chemical genetics. *Nat Struct Mol Biol* **13**,  
689 55-62 (2006).
- 690 38 Bernecky, C., Plitzko, J. M. & Cramer, P. Structure of a transcribing RNA  
691 polymerase II-DSIF complex reveals a multidentate DNA-RNA clamp. *Nat Struct*  
692 *Mol Biol* **24**, 809-815, doi:10.1038/nsmb.3465 (2017).
- 693 39 Ehara, H. *et al.* Structure of the complete elongation complex of RNA polymerase  
694 II with basal factors. *Science* **357**, 921-924, doi:10.1126/science.aan8552 (2017).
- 695 40 Booth, G. T., Wang, I. X., Cheung, V. G. & Lis, J. T. Divergence of a conserved  
696 elongation factor and transcription regulation in budding and fission yeast.  
697 *Genome Res* **26**, 799-811, doi:10.1101/gr.204578.116 (2016).
- 698 41 Gomes, N. P. *et al.* Gene-specific requirement for P-TEFb activity and RNA  
699 polymerase II phosphorylation within the p53 transcriptional program. *Genes Dev*  
700 **20**, 601-612 (2006).
- 701 42 Vassilev, L. T. *et al.* In vivo activation of the p53 pathway by small-molecule  
702 antagonists of MDM2. *Science* **303**, 844-848, doi:10.1126/science.1092472  
703 (2004).
- 704 43 Voss, M. *et al.* Protein phosphatase 4 is phosphorylated and inactivated by Cdk  
705 in response to spindle toxins and interacts with gamma-tubulin. *Cell Cycle* **12**,  
706 2876-2887, doi:10.4161/cc.25919 (2013).
- 707 44 Nedea, E. *et al.* The Glc7 phosphatase subunit of the cleavage and  
708 polyadenylation factor is essential for transcription termination on snoRNA  
709 genes. *Mol Cell* **29**, 577-587, doi:10.1016/j.molcel.2007.12.031 (2008).
- 710 45 Schrieck, A. *et al.* RNA polymerase II termination involves C-terminal-domain  
711 tyrosine dephosphorylation by CPF subunit Glc7. *Nat Struct Mol Biol* **21**, 175-  
712 179, doi:10.1038/nsmb.2753 (2014).

- 713 46 Grohmann, D. *et al.* The initiation factor tfe and the elongation factor Spt4/5  
714 compete for the RNAP clamp during transcription initiation and elongation. *Mol*  
715 *Cell* **43**, 263-274 (2011).
- 716 47 Baejen, C. *et al.* Genome-wide Analysis of RNA Polymerase II Termination at  
717 Protein-Coding Genes. *Mol Cell* **66**, 38-49 e36, doi:10.1016/j.molcel.2017.02.009  
718 (2017).
- 719 48 Shetty, A. *et al.* Spt5 Plays Vital Roles in the Control of Sense and Antisense  
720 Transcription Elongation. *Mol Cell* **66**, 77-88 e75,  
721 doi:10.1016/j.molcel.2017.02.023 (2017).
- 722 49 Fong, N. *et al.* Effects of Transcription Elongation Rate and Xrn2 Exonuclease  
723 Activity on RNA Polymerase II Termination Suggest Widespread Kinetic  
724 Competition. *Mol Cell* **60**, 256-267, doi:10.1016/j.molcel.2015.09.026 (2015).
- 725 50 Laitem, C. *et al.* CDK9 inhibitors define elongation checkpoints at both ends of  
726 RNA polymerase II-transcribed genes. *Nat Struct Mol Biol* **22**, 396-403,  
727 doi:10.1038/nsmb.3000 (2015).
- 728 51 Sen, I. *et al.* DAF-16/FOXO requires Protein Phosphatase 4 to initiate  
729 transcription of stress resistance and longevity promoting genes. *Nat Commun*  
730 **11**, 138, doi:10.1038/s41467-019-13931-7 (2020).
- 731 52 Blethrow, J. D., Glavy, J. S., Morgan, D. O. & Shokat, K. M. Covalent capture of  
732 kinase-specific phosphopeptides reveals Cdk1-cyclin B substrates. *Proc Natl*  
733 *Acad Sci U S A* **105**, 1442-1447 (2008).
- 734 53 Yamano, H., Ishii, K. & Yanagida, M. Phosphorylation of dis2 protein  
735 phosphatase at the C-terminal cdc2 consensus and its potential role in cell cycle  
736 regulation. *EMBO J* **13**, 5310-5318 (1994).
- 737 54 Wu, J. Q. *et al.* PP1-mediated dephosphorylation of phosphoproteins at mitotic  
738 exit is controlled by inhibitor-1 and PP1 phosphorylation. *Nat Cell Biol* **11**, 644-  
739 651, doi:10.1038/ncb1871 (2009).
- 740 55 Swaffer, M. P., Jones, A. W., Flynn, H. R., Snijders, A. P. & Nurse, P. CDK  
741 Substrate Phosphorylation and Ordering the Cell Cycle. *Cell* **167**, 1750-1761  
742 e1716, doi:10.1016/j.cell.2016.11.034 (2016).
- 743 56 Sansó, M. *et al.* A Positive Feedback Loop Links Opposing Functions of P-  
744 TEFb/Cdk9 and Histone H2B Ubiquitylation to Regulate Transcript Elongation in  
745 Fission Yeast. *PLoS Genet* **8**, e1002822 (2012).
- 746 57 Mirzoeva, O. K. & Petrini, J. H. DNA replication-dependent nuclear dynamics of  
747 the Mre11 complex. *Mol Cancer Res* **1**, 207-218 (2003).
- 748 58 Langmead, B. & Salzberg, S. L. Fast gapped-read alignment with Bowtie 2. *Nat*  
749 *Methods* **9**, 357-359, doi:10.1038/nmeth.1923 (2012).
- 750 59 Feng, J., Liu, T., Qin, B., Zhang, Y. & Liu, X. S. Identifying ChIP-seq enrichment  
751 using MACS. *Nat Protoc* **7**, 1728-1740, doi:10.1038/nprot.2012.101 (2012).
- 752 60 Ramirez, F. *et al.* deepTools2: a next generation web server for deep-sequencing  
753 data analysis. *Nucleic Acids Res* **44**, W160-165, doi:10.1093/nar/gkw257 (2016).
- 754

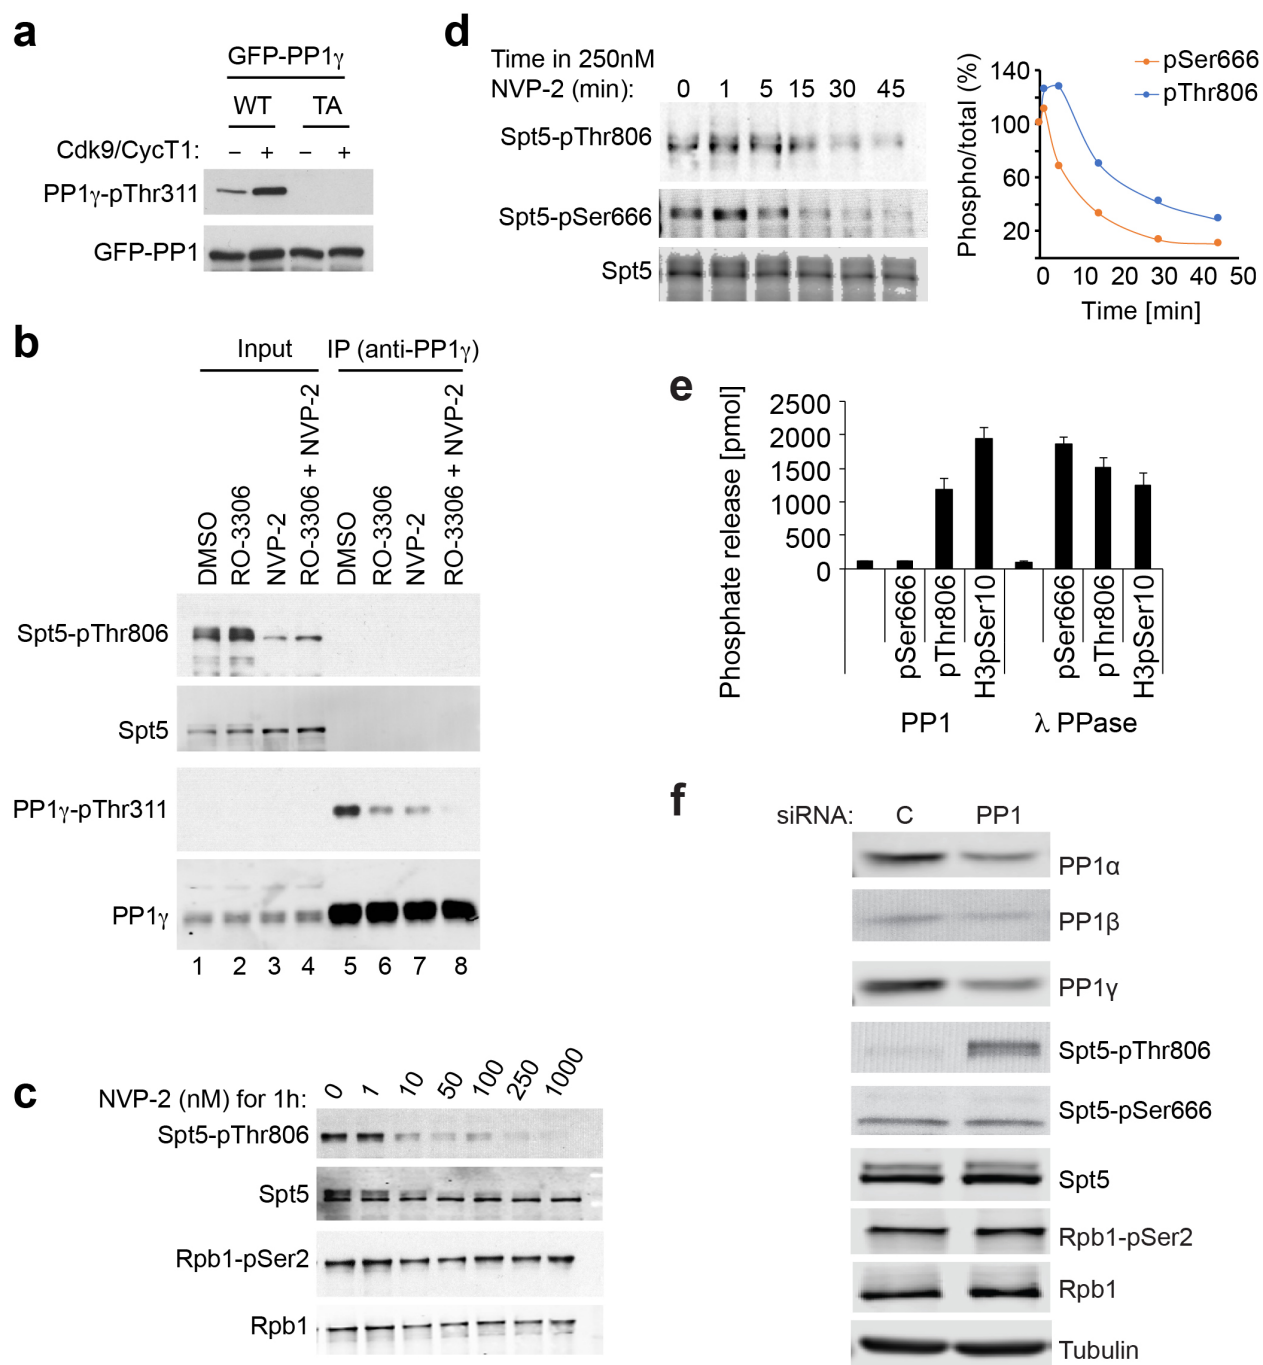

**Fig. 1 A Cdk9-PP1 switch governing Spt5 phosphorylation is conserved in human cells. a**

Purified, recombinant Cdk9/cyclin T1 phosphorylates wild-type (WT) GFP-PP1 $\gamma$ , expressed in human cells and recovered by anti-GFP immunoprecipitation, but not a Thr311 $\rightarrow$ Ala (TA) mutant variant. Phosphorylation was detected with antibody specific for the carboxy-terminal phosphorylation site (Thr320) in PP1 $\alpha$  isoform, analogous to Thr311 of PP1 $\gamma$ . **b** Inhibition of Cdk9 or Cdk1 diminishes PP1 $\gamma$ -inhibitory phosphorylation in human cells. HCT116 cells were treated with DMSO, a Cdk1 inhibitor (RO-3306), a Cdk9 inhibitor (NVP-2), or both, as indicated. Extracts were analyzed by direct immunoblotting (lanes 1-4), or anti-PP1 $\gamma$  immunoprecipitation

followed by immunoblotting (lanes 5-8), with the indicated antibodies. **c** Cdk9 inhibition diminishes phosphorylation of Spt5-Thr806 but not Ser2 of the Pol II CTD. HCT116 cells were treated with the indicated concentrations of NVP-2 for 1 hr and extracts were immunoblotted with the indicated antibodies. **d** HCT116 cells were treated with 250 nM NVP-2 for indicated times and extracts were immunoblotted with antibodies specific for Spt5, Spt5-pThr806 and Spt5-pSer666, as indicated. Immunoblot signals were quantified with ImageJ software. **e** Spt5-derived phosphopeptides containing pSer666 or pThr806 or a control histone H3-derived phosphopeptide containing pSer10, as indicated, were incubated with purified PP1 or lambda phosphatase, as indicated, and phosphate release was measured colorimetrically. Error bars indicate + standard deviation from mean (s.d.) of three biological replicates. **f** HCT116 cells were transfected with an siRNA cocktail targeting all three PP1 catalytic-subunit isoforms or a control (scrambled) siRNA, as indicated, and extracts were immunoblotted for the indicated proteins or protein modifications.



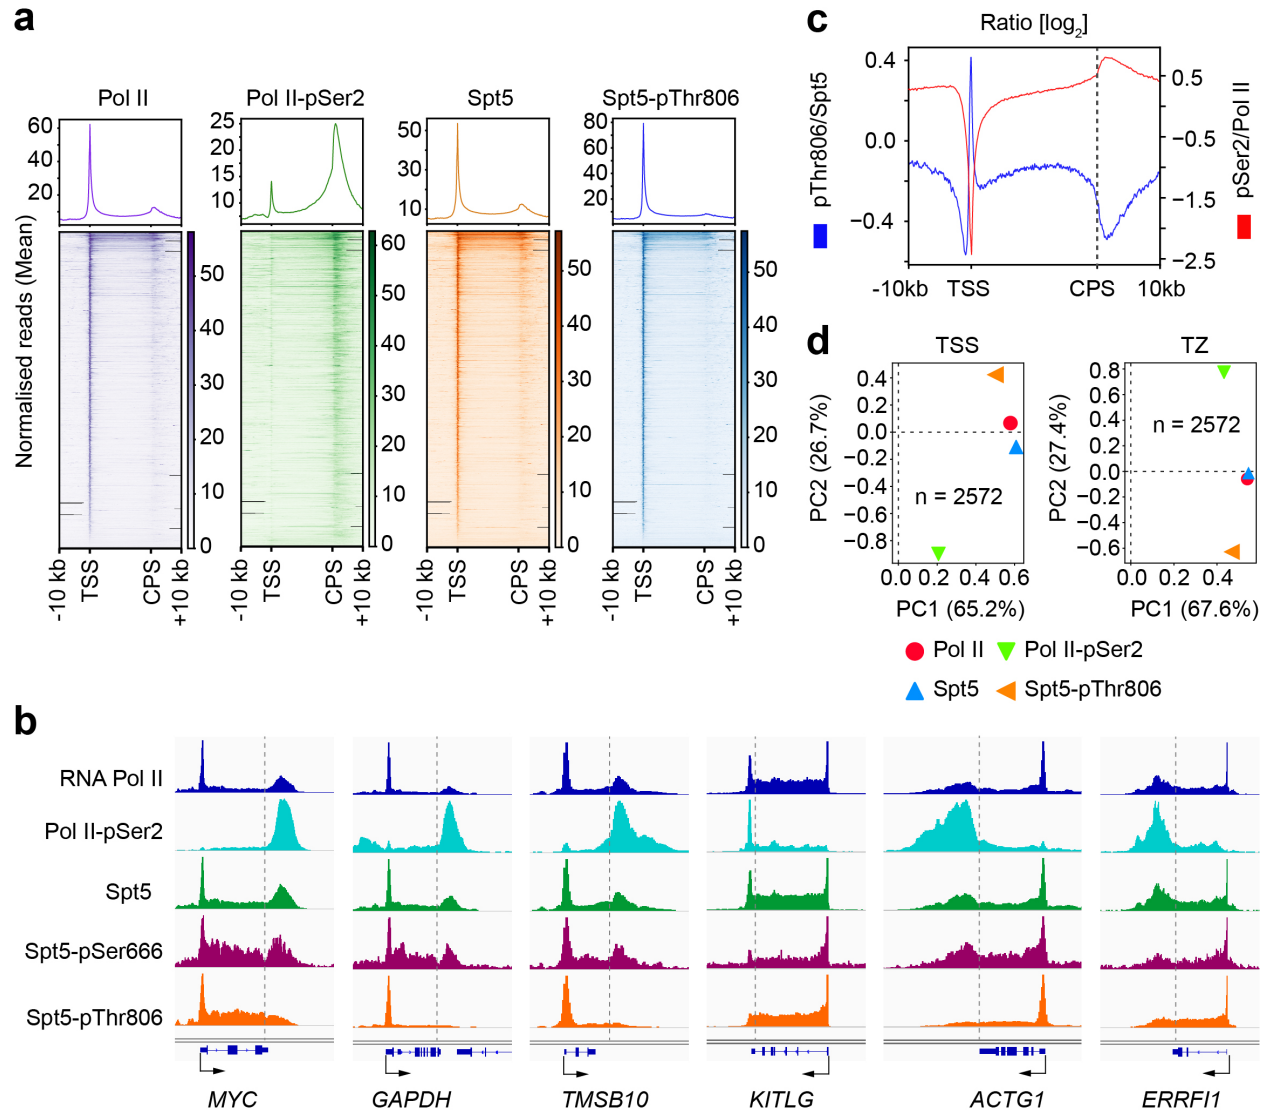

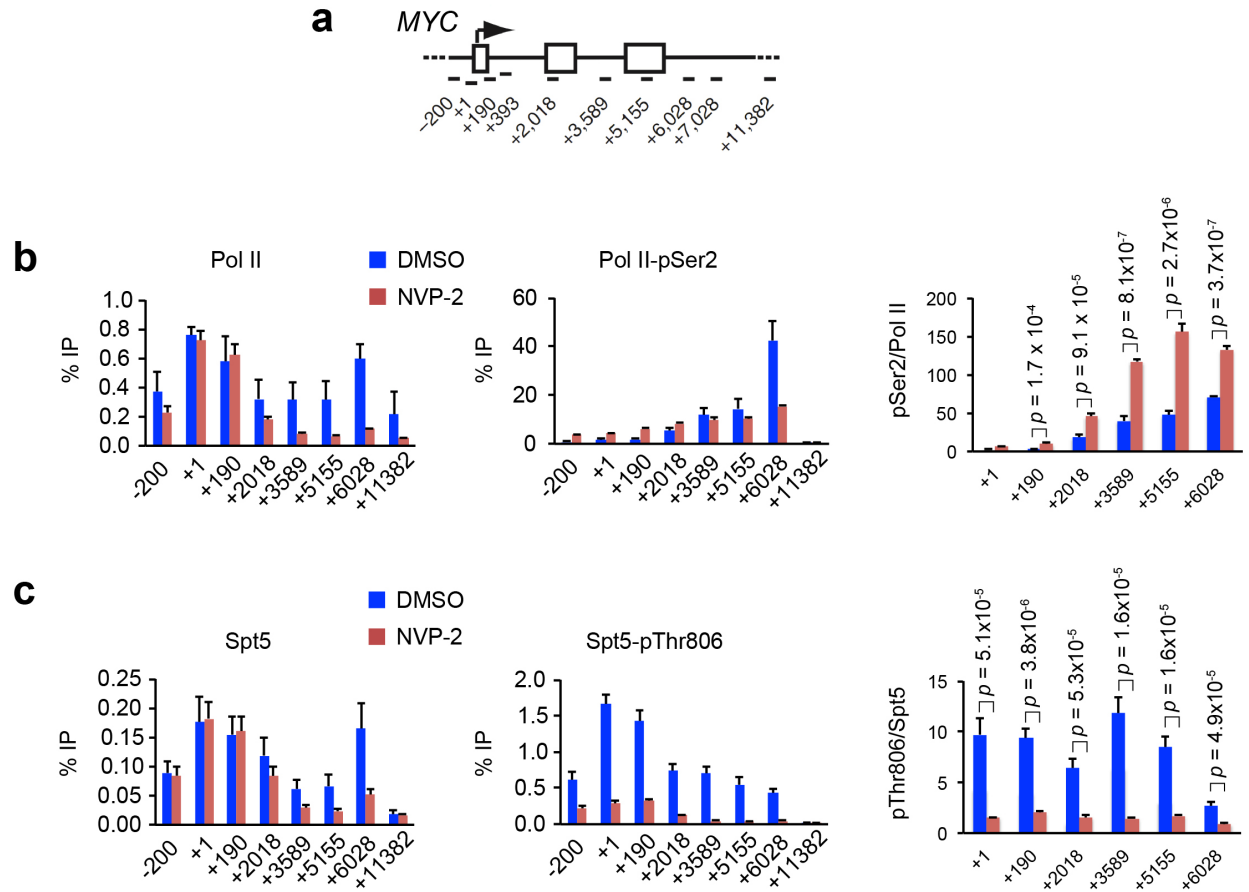

**Fig. 3 Cdk9 inhibition diminishes Spt5-CTR1 phosphorylation but increases Pol II CTD-Ser2 phosphorylation on chromatin.** **a** Schematic of the *MYC* gene, indicating positions of primer pairs used in ChIP-qPCR analysis. **b** ChIP-qPCR analysis of total Pol II and CTD-Ser2 phosphorylation in HCT116 cells treated with NVP-2 (250 nM) or mock treated (DMSO) for 1 hr. **c** ChIP-qPCR analysis of total Spt5 and Spt5-Thr806 phosphorylation in HCT116 cells treated with NVP-2 (250 nM) or mock treated (DMSO) for 1 hr. Indicated *p* values were calculated using Student's *t*-test. Error bars indicate + s.d. of four biological replicates (**b** and **c**).

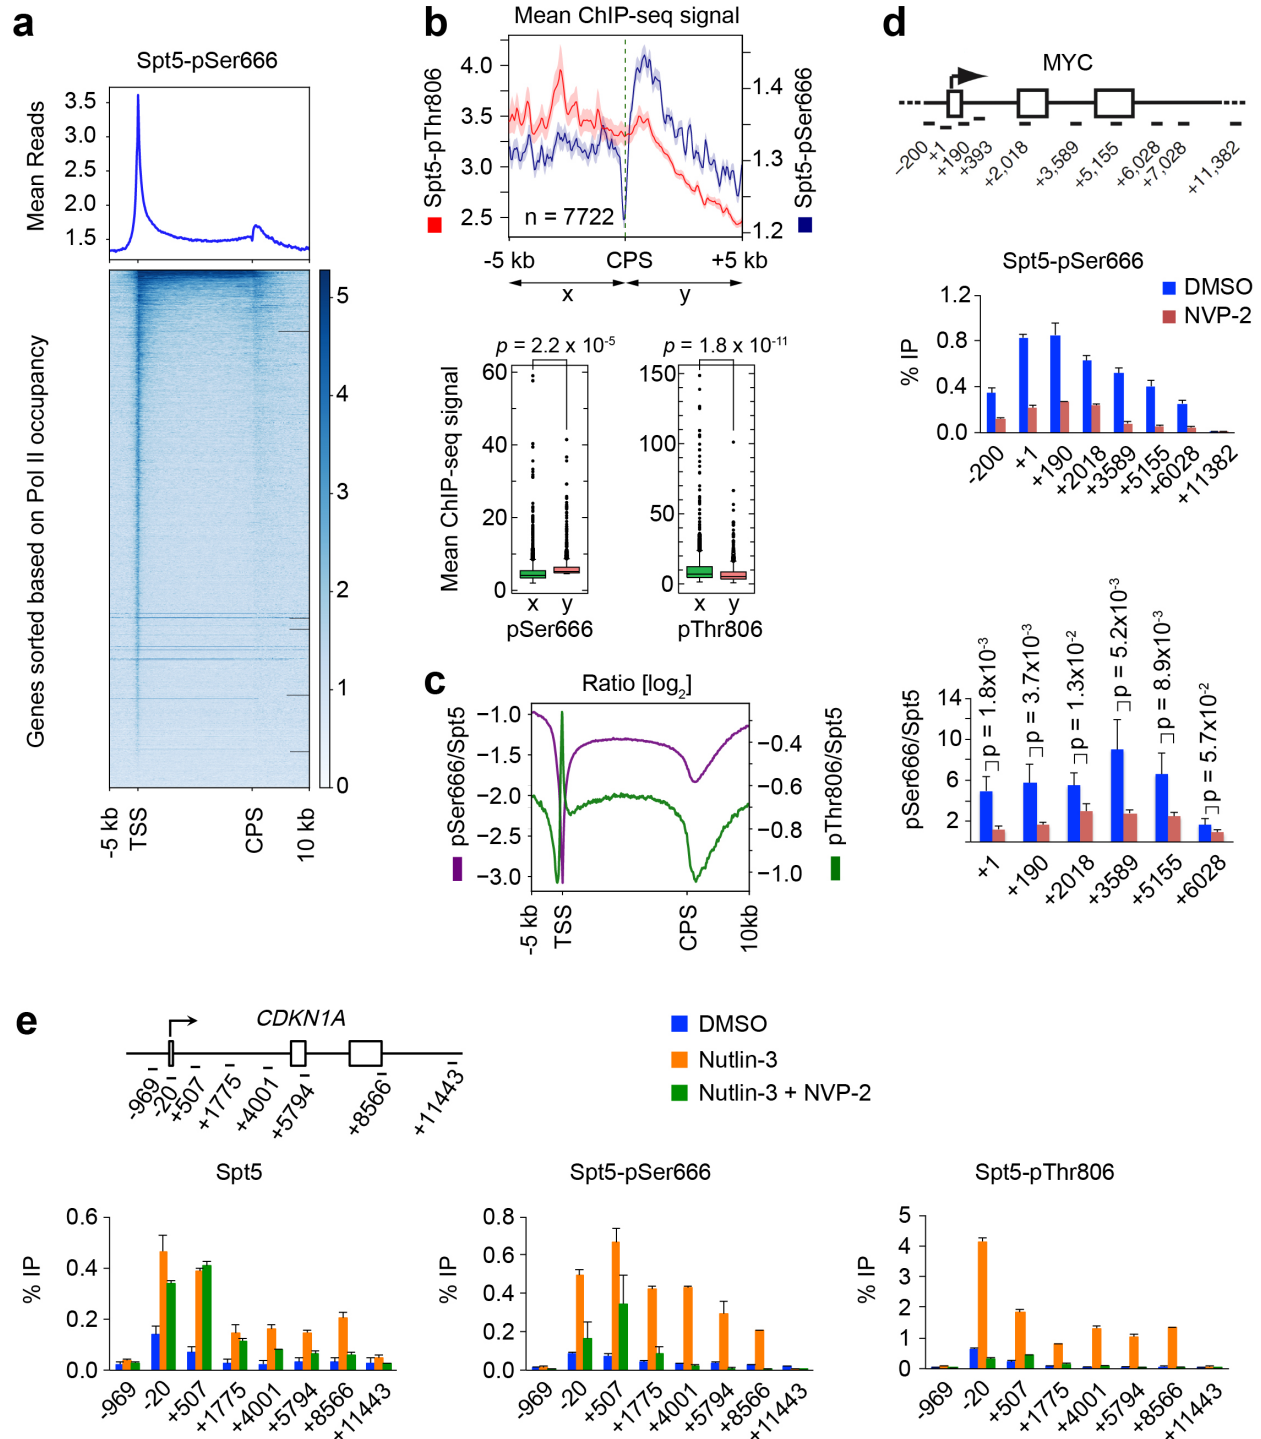

**Fig. 4 Chromatin distribution of Spt5-pSer666 is distinct from that of Spt5-pThr806. a** Metagenome analyses and heat maps ( $n = 20,130$  genes) of ChIP-seq data for Spt5-pSer666 ( $n = 2$  biological replicates). **b** Genes separated from their neighbors at both ends by  $>10$  kilobases ( $n = 7,772$ ) show significant accumulation of pSer666 but not pThr806 downstream of the CPS (top, metagenome plots; bottom, box plots). **c** Metagenome analysis of pSer666:Spt5 and pThr806:Spt5 ratios ( $n = 20,130$  genes). **d** ChIP-qPCR analysis of Spt5-Ser666 phosphorylation in HCT116 cells treated with NVP-2 (250 nM) or mock treated (DMSO) for 1 hr. Indicated  $p$



values were calculated using Student's *t*-test. Error bars indicate + s.d. of four biological replicates. **e** Schematic of the *CDKN1A* gene, indicating positions of primer pairs used in ChIP-qPCR analysis (top). ChIP-qPCR analysis of total Spt5, Spt5-pSer666 and Spt5-pThr806 in HCT116 cells mock treated (DMSO) or treated with 5  $\mu$ M nutlin-3 alone or together with 250 nM NVP-2 for 2 hr. Error bars indicate + s.d. of four biological replicates.

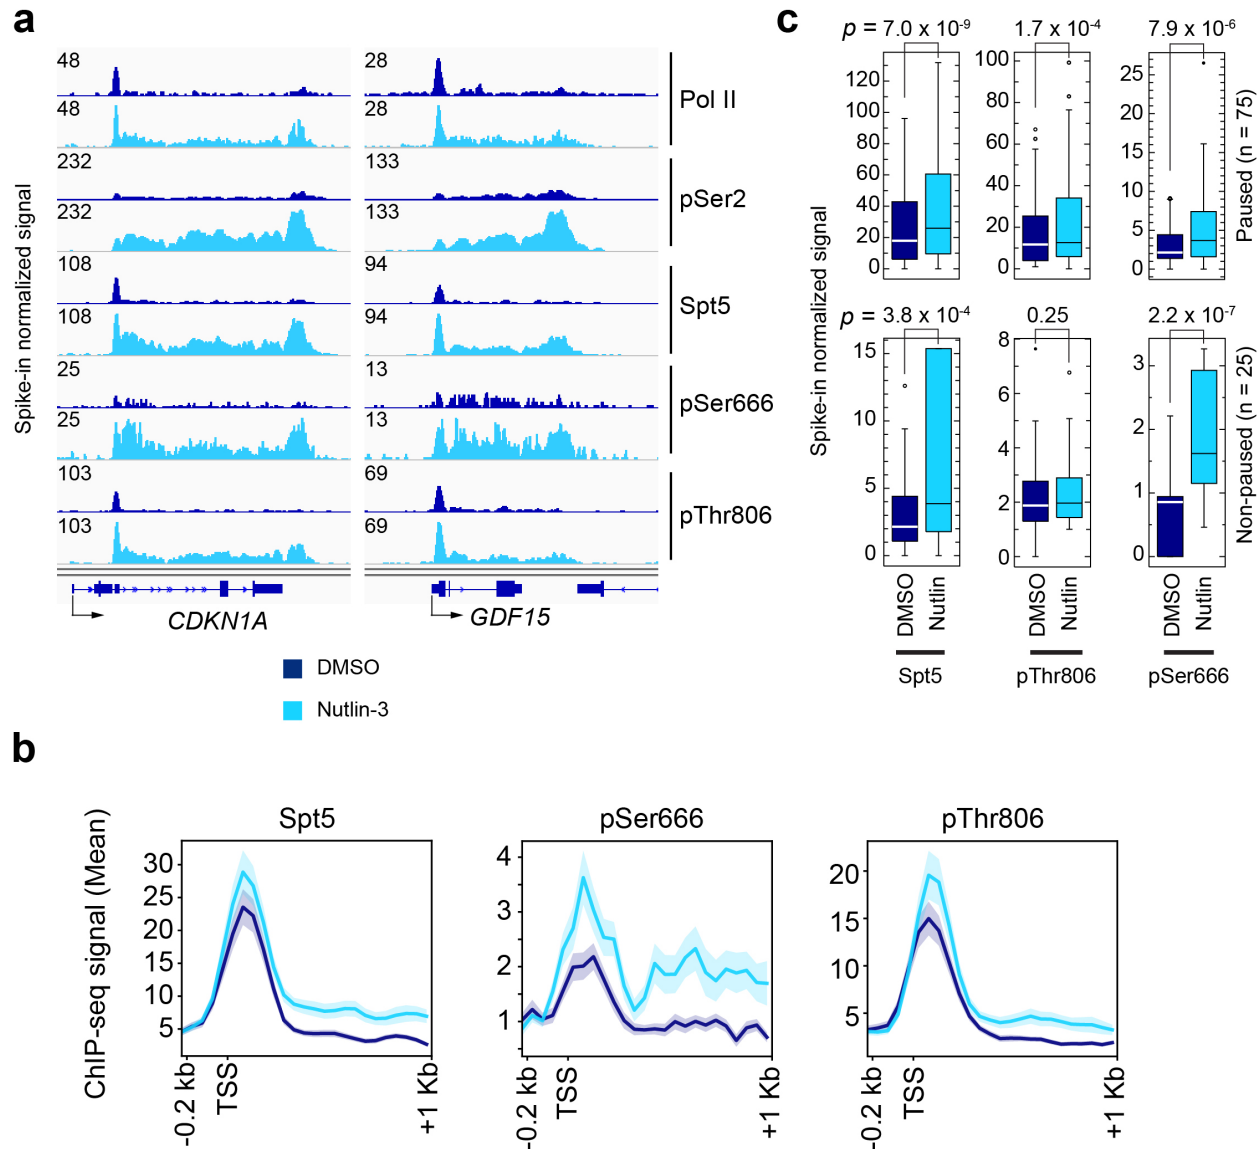

**Fig. 5 Phosphorylation of Spt5-Ser666 is increased downstream of the TSS and retained downstream of the CPS on genes induced by p53 activation.** **a** Individual ChIP-seq gene tracks at *CDKN1A* and *GDF15*—two p53 targets—in HCT116 cells mock-treated (DMSO) or treated with 5  $\mu$ M nutlin-3 for 2 hr. **b** Metagenesis analysis of Spt5, Spt5-pThr806 and Spt5-pSer666 at genes induced by nutlin-3 ( $n = 75$ ; paused genes). **c** Box plots comparing ChIP-seq reads in first 100-nt interval downstream of TSS, in the absence or presence of nutlin-3, for Spt5, Spt5-pThr806 and Spt5-pSer666 at genes induced by nutlin-3, divided into those classified as pause-regulated (pause index  $\geq 2.0$ ,  $n = 75$ ) or non-paused (pause index  $< 2.0$ ,  $n = 25$ ).

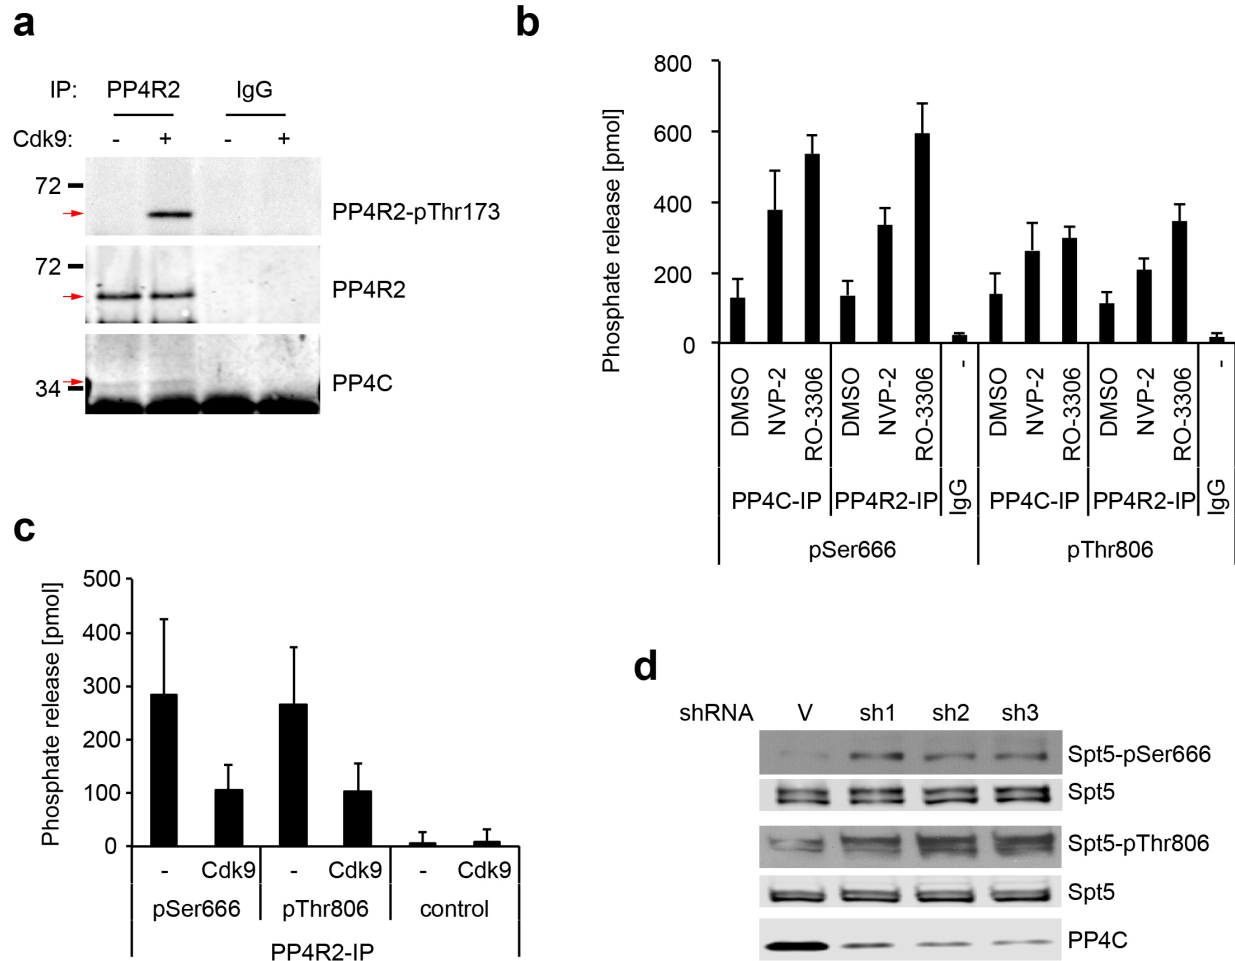

**Fig. 6 PP4 is a potential Spt5 phosphatase, active towards pSer666 and pThr806 and subject to negative regulation by Cdk9.** **a** PP4R2 was immunoprecipitated from HCT116 cell extracts, incubated in vitro with purified, recombinant Cdk9/cyclin T1 and ATP, and immunoblotted with antibodies to PP4R2-pThr173, total PP4R2 or PP4C, as indicated at *right*. **b** HCT116 cells were mock-treated (DMSO) or treated with inhibitors of Cdk9 (NVP-2) or Cdk1 (RO-3306), as indicated, for 1 hr before lysis and extract preparation. Anti-PP4R2, anti-PP4C or control IgG immunoprecipitates, as indicated, were incubated with Spt5-derived phosphopeptides containing pSer666 or pThr806, as indicated, and phosphate release was measured colorimetrically. Error bars indicate + s.d. of six biological replicates. **c** Anti-PP4R2 immunoprecipitates were incubated with 5 ng purified, recombinant Cdk9/cyclin T1 and ATP or mock-treated (as indicated), washed and tested for phosphatase activity towards an Spt5-derived phosphopeptide containing pSer666, as in **b**. Error bars indicate + s.d. from three biological replicates. **d** HCT116 cells were infected with lentivirus expressing shRNA targeting PP4C (three different hairpins) or a non-targeted control vector (V), and chromatin fractions were immunoblotted for Spt5-pSer666, Spt5-pThr806, total Spt5 (to ensure equal loading) and total PP4C (to assess efficiency of depletion).

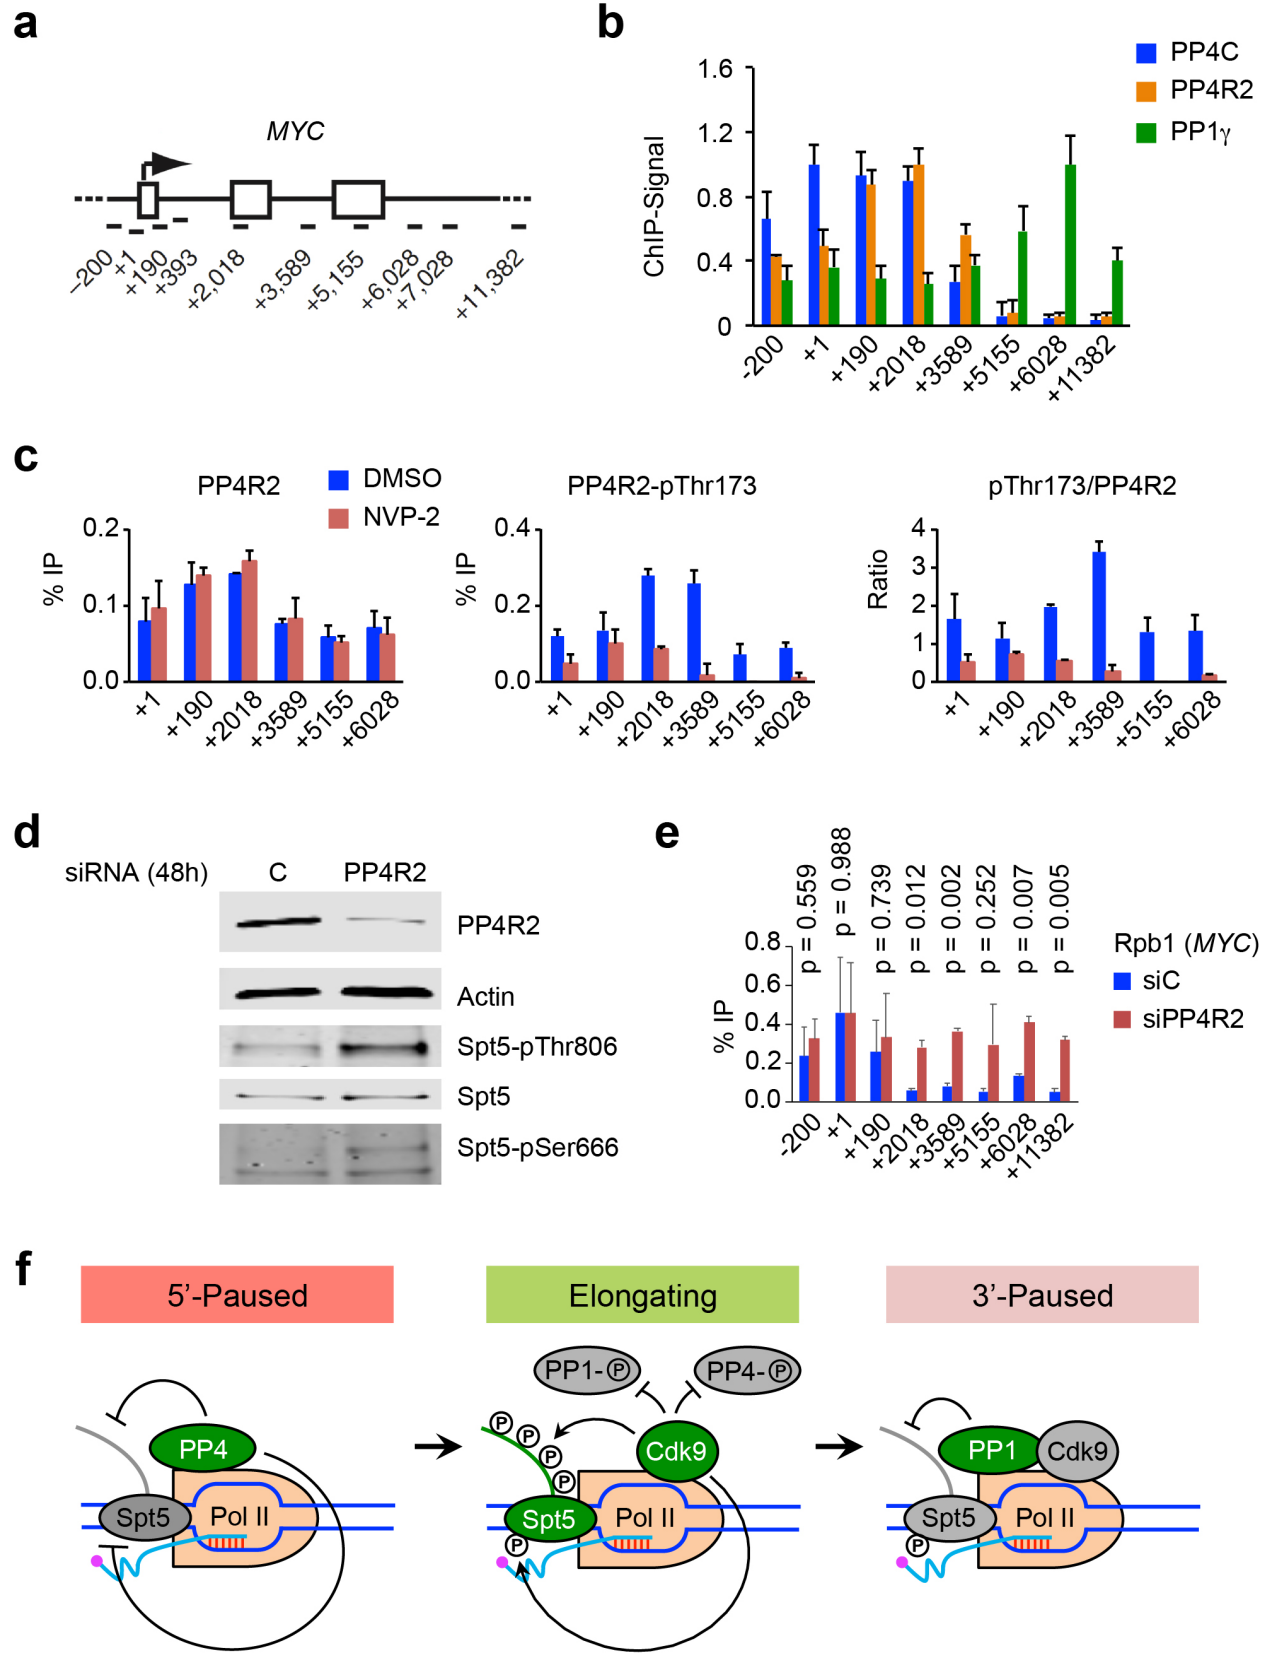

**Fig. 7 Distinct spatial distributions and specificities of two Cdk9-regulated phosphatases serve to order the transcription cycle.** **a** Schematic of the *MYC* gene, indicating positions of primer pairs used in ChIP-qPCR analysis. **b** ChIP-qPCR analysis of PP4C, PP4R2 and PP1 $\gamma$  on the *MYC* gene in unperturbed HCT116 cells. Error bars indicate + s.d. of two biological replicates. **c** ChIP-qPCR analysis of PP4R2 and PP4R2-pThr173 after inhibition of Cdk9 with NVP-2 (250 nM) or mock treatment (DMSO) for 1 hr. Error bars indicate + s.d. of two biological replicates. **d** Cells transfected with siRNA targeting PP4R2 or non-targeted negative control siRNA were subjected to formaldehyde crosslinking, chromatin isolation and reversal of crosslinking before analysis by immunoblotting with indicated antibodies to measure the depletion of PP4R2 and phosphorylation of Spt5 at Ser666 and Thr806. **e** ChIP-qPCR analysis on *MYC* shows Pol II distribution with or without PP4R2 depletion. Error bars (+ s.d.) and *p*-values were calculated using data from four biological replicates (*n* = 4). **f** Two distinct Cdk9-phosphatase switches govern transitions in Spt5 phosphorylation state—a model. At the 5' pause prior to P-TEFb activation, the PP4 complex is active and both CTR1 and the KOW4-KOW5 loop are unphosphorylated, At the 3' pause, PP1 becomes active to dephosphorylate CTR1 but not Ser666, distinguishing the two paused complexes. During elongation, Cdk9 phosphorylates Spt5, and inhibits PP4 and PP1.
